# Supplementary material for: Inclusion of picolines by a substituted binaphthyl diol host: selectivity and structure
Source: Royal Society of Chemistry journal article supplement (doi:10.1039/c3ra45849k), 2013-01-01
Supplement: c3ra45849k.pdf [file c3ra45849k.pdf]

## **Supporting Information**

### **Inclusion of Picolines by a Substituted Binaphthyl Diol Host: Selectivity and Structure**

Luigi R Nassimbeni,<sup>\*a</sup> Samipillai Marivel<sup>a</sup>, Hong Su<sup>a</sup>, and Edwin Weber<sup>b</sup>

<sup>a</sup>Department of Chemistry, University of Cape Town,  
Private Bag, Rondebosch 7701, South Africa  
Email: Luigi.Nassimbeni@uct.ac.za

<sup>b</sup>Institut für Organische Chemie, Technische Universität,  
Bergakademie Freiberg, Leipziger Strasse 29, D-09596 Freiberg/  
Sachsen, Germany.  
E-mail: Edwin.Weber@chemie.tu-freiberg.de

## List of Contents

- Table 1S. X-Ray data and refinement parameters for the compounds **V-IX**
- Table 2S. <sup>1</sup>H-NMR values for **H.2PIC/3PIC**, **H.2PIC/4PIC**, **H.3PIC/4PIC**
- Table 3S. <sup>1</sup>H-NMR values of three-guest competition experiment, **H.2PIC/3PIC/4PIC**

### <sup>1</sup>H-NMR Spectra

| Sl. No | Content                                                   | Page No. | Sl. No. | Content                                                                  | Page No. |
|--------|-----------------------------------------------------------|----------|---------|--------------------------------------------------------------------------|----------|
| 1      | <sup>1</sup> H-NMR of Host - <b>H</b>                     | 6        | 2d      | <sup>1</sup> H-NMR of H.2PIC/4PIC (0.7 : 0.3)                            | 22       |
| 2      | <sup>1</sup> H-NMR of H.2PIC - <b>I</b>                   | 7        | 2e      | <sup>1</sup> H-NMR of H.2PIC/4PIC (0.8 : 0.2)                            | 23       |
| 3      | <sup>1</sup> H-NMR of H.3PIC - <b>II</b>                  | 8        | 2f      | <sup>1</sup> H-NMR of H.2PIC/4PIC (0.85 : 0.15)                          | 24       |
| 4      | <sup>1</sup> H-NMR of H.4PIC - <b>III</b>                 | 9        | 2g      | <sup>1</sup> H-NMR of H.2PIC/4PIC (0.9 : 0.1)                            | 25       |
|        | <b>H.2PIC/3PIC</b>                                        |          |         | <b>H.3PIC/4PIC</b>                                                       |          |
| 1a     | <sup>1</sup> H-NMR of H.2PIC/3PIC (0.1 : 0.9)             | 10       | 3a      | <sup>1</sup> H-NMR of H.3PIC/4PIC (0.9 : 0.1)                            | 26       |
| 1b     | <sup>1</sup> H-NMR of H.2PIC/3PIC (0.2 : 0.8)             | 11       | 3b      | <sup>1</sup> H-NMR of H.3PIC/4PIC (0.8 : 0.2)                            | 27       |
| 1c     | <sup>1</sup> H-NMR of H.2PIC/3PIC (0.3 : 0.7)             | 12       | 3c      | <sup>1</sup> H-NMR of H.3PIC/4PIC (0.7 : 0.3)                            | 28       |
| 1d     | <sup>1</sup> H-NMR of H.2PIC/3PIC (0.4 : 0.6)             | 13       | 3d      | <sup>1</sup> H-NMR of H.3PIC/4PIC (0.6 : 0.4) - <b>VI</b> and <b>VII</b> | 29       |
| 1e     | <sup>1</sup> H-NMR of H.2PIC/3PIC (0.5 : 0.5)             | 14       | 3e      | <sup>1</sup> H-NMR of H.3PIC/4PIC (0.5 : 0.5)                            | 30       |
| 1f     | <sup>1</sup> H-NMR of H.2PIC/3PIC (0.6 : 0.4) - <b>V</b>  | 15       | 3f      | <sup>1</sup> H-NMR of H.3PIC/4PIC (0.4 : 0.6)                            | 31       |
| 1g     | <sup>1</sup> H-NMR of H.2PIC/3PIC (0.7 : 0.3) - <b>IV</b> | 16       |         | <b>H.2PIC/3PIC/4PIC</b>                                                  |          |
| 1h     | <sup>1</sup> H-NMR of H.2PIC/3PIC (0.8 : 0.2)             | 17       | 4a      | <sup>1</sup> H-NMR of H.2PIC/3PIC/4PIC (0.6 : 0.2 : 0.2)                 | 32       |
| 1i     | <sup>1</sup> H-NMR of H.2PIC/3PIC (0.9 : 0.1)             | 18       | 4b      | <sup>1</sup> H-NMR of H.2PIC/3PIC/4PIC (0.4 : 0.4 : 0.2) - <b>IX</b>     | 33       |
|        | <b>H.2PIC/4PIC</b>                                        |          | 4c      | <sup>1</sup> H-NMR of H.2PIC/3PIC/4PIC (0.4 : 0.2 : 0.4)                 | 34       |
| 2a     | <sup>1</sup> H-NMR of H.2PIC/4PIC (0.4 : 0.6)             | 19       | 4d      | <sup>1</sup> H-NMR of H.2PIC/3PIC/4PIC (0.2 : 0.6 : 0.2) - <b>VIII</b>   | 35       |
| 2b     | <sup>1</sup> H-NMR of H.2PIC/4PIC (0.5 : 0.5)             | 20       | 4e      | <sup>1</sup> H-NMR of H.2PIC/3PIC/4PIC (0.2 : 0.4 : 0.4)                 | 36       |
| 2c     | <sup>1</sup> H-NMR of H.2PIC/4PIC (0.6 : 0.4)             | 21       | 4f      | <sup>1</sup> H-NMR of H.2PIC/3PIC/4PIC (0.2 : 0.2 : 0.6)                 | 37       |
|        |                                                           |          | 4g      | <sup>1</sup> H-NMR of H.2PIC/3PIC/4PIC (0.33 : 0.33 : 0.33)              | 38       |

Table 1S. X-Ray data and refinement parameters for **V-IX**

| <b>Compound</b>                                         | <b>H.2PIC:3PIC(0.21:0.79)</b>                   | <b>H.3PIC</b>                                                 | <b>H.4PIC</b>                                   | <b>H.3PIC</b>                                                 | <b>H.4PIC</b>                                   |
|---------------------------------------------------------|-------------------------------------------------|---------------------------------------------------------------|-------------------------------------------------|---------------------------------------------------------------|-------------------------------------------------|
| <b>Structure</b>                                        | <b>V</b>                                        | <b>VI</b>                                                     | <b>VII</b>                                      | <b>VIII</b>                                                   | <b>IX</b>                                       |
| <b>Comment</b>                                          | Similar to <b>IV</b>                            | Same as <b>II</b>                                             | Same as <b>III</b>                              | Same as <b>II</b>                                             | Same as <b>III</b>                              |
| Empirical formula                                       | C <sub>52</sub> H <sub>37</sub> NO <sub>2</sub> | C <sub>58</sub> H <sub>44</sub> N <sub>2</sub> O <sub>2</sub> | C <sub>52</sub> H <sub>37</sub> NO <sub>2</sub> | C <sub>58</sub> H <sub>44</sub> N <sub>2</sub> O <sub>2</sub> | C <sub>52</sub> H <sub>37</sub> NO <sub>2</sub> |
| Formula weight                                          | 707.83                                          | 800.95                                                        | 707.83                                          | 800.95                                                        | 707.83                                          |
| Crystal system                                          | monoclinic                                      | monoclinic                                                    | monoclinic                                      | monoclinic                                                    | monoclinic                                      |
| Space group                                             | <i>P2<sub>1</sub>/n</i>                         | <i>P2<sub>1</sub>/c</i>                                       | <i>P2<sub>1</sub>/n</i>                         | <i>P2<sub>1</sub>/c</i>                                       | <i>P2<sub>1</sub>/n</i>                         |
| <i>a</i> [Å]                                            | 9.873(2)                                        | 16.709(4)                                                     | 9.9384(6)                                       | 16.6896(3)                                                    | 9.9367(6)                                       |
| <i>b</i> [Å]                                            | 20.894(6)                                       | 11.588(2)                                                     | 20.7758(12)                                     | 11.5679(2)                                                    | 20.7808(13)                                     |
| <i>c</i> [Å]                                            | 18.825(6)                                       | 22.298(9)                                                     | 18.8529(11)                                     | 22.3133(5)                                                    | 18.8561(12)                                     |
| $\alpha$ [°]                                            | 90                                              | 90                                                            | 90                                              | 90                                                            | 90                                              |
| $\beta$ [°]                                             | 99.15(3)                                        | 95.08(1)                                                      | 100.60(1)                                       | 95.14(3)                                                      | 100.66(1)                                       |
| $\gamma$ [°]                                            | 90                                              | 90                                                            | 90                                              | 90                                                            | 90                                              |
| <i>V</i> [Å <sup>3</sup> ]                              | 3833.85(18)                                     | 4300.7(2)                                                     | 3826.2(4)                                       | 4290.56(18)                                                   | 3826.4(4)                                       |
| <i>Z</i>                                                | 4                                               | 4                                                             | 4                                               | 4                                                             | 4                                               |
| Temperature(K)                                          | 173                                             | 173                                                           | 173                                             | 173                                                           | 173                                             |
| <i>D</i> <sub>calc</sub> (g/cm <sup>-3</sup> )          | 1.226                                           | 1.237                                                         | 1.229                                           | 1.240                                                         | 1.229                                           |
| $\mu$ (Mo-K $\alpha$ )(mm <sup>-1</sup> )               | 0.074                                           | 0.074                                                         | 0.074                                           | 0.074                                                         | 0.074                                           |
| <i>F</i> (000)                                          | 1488                                            | 1688                                                          | 1488                                            | 1688                                                          | 1488.0                                          |
| Crystal size/mm                                         | 0.09x0.18x0.29                                  | 0.09x0.16x0.24                                                | 0.09x0.12x0.24                                  | 0.08x0.16x0.21                                                | 0.1x0.12x0.28                                   |
| Reflections collected                                   | 8782                                            | 18447                                                         | 44983                                           | 8756                                                          | 27993                                           |
| Independent reflections                                 | 8782                                            | 9465                                                          | 9631                                            | 8756                                                          | 8755                                            |
| Observed reflections<br>[ <i>I</i> >2s( <i>I</i> )]     | 6668                                            | 7131                                                          | 6536                                            | 5673                                                          | 5861                                            |
| Parameters                                              | 498                                             | 569                                                           | 505                                             | 569                                                           | 505                                             |
| Goodness-of-fit <i>F</i> <sup>2</sup>                   | 1.032                                           | 1.035                                                         | 1.018                                           | 1.016                                                         | 1.019                                           |
| R <sub>1</sub> [ <i>I</i> >2s( <i>I</i> )] <sup>a</sup> | 0.0467                                          | 0.0475                                                        | 0.0476                                          | 0.0496                                                        | 0.0458                                          |
| wR <sub>2</sub> (all data) <sup>b</sup>                 | 0.1213                                          | 0.1370                                                        | 0.1224                                          | 0.1380                                                        | 0.1212                                          |

Table 2S. <sup>1</sup>H-NMR values for **H.2PIC/3PIC**, **H.2PIC/4PIC**, **H.3PIC/4PIC**

|                    |                          |      |      |      |      |      |      |      |      |      |      |      |     |
|--------------------|--------------------------|------|------|------|------|------|------|------|------|------|------|------|-----|
| <b>H.2PIC/3PIC</b> | <i>X</i> <sub>3PIC</sub> | 0.10 | -    | 0.20 | 0.30 | 0.40 | -    | 0.50 | 0.60 | 0.70 | 0.80 | 0.90 | 1.0 |
|                    | <i>Z</i> <sub>3PIC</sub> | 0.15 | -    | 0.47 | 0.58 | 0.67 | -    | 0.76 | 0.85 | 0.87 | 0.93 | 0.99 | 1.0 |
| <b>H.2PIC/4PIC</b> | <i>X</i> <sub>4PIC</sub> | 0.10 | 0.15 | 0.20 | 0.30 | 0.40 | -    | 0.50 | 0.60 | 0.70 | 0.80 | 0.90 | 1.0 |
|                    | <i>Z</i> <sub>4PIC</sub> | 0.02 | 0.74 | 0.91 | 0.92 | 0.97 | -    | 0.98 | 0.98 | -    | -    | -    | 1.0 |
| <b>H.3PIC/4PIC</b> | <i>X</i> <sub>4PIC</sub> | 0.10 | -    | 0.20 | 0.30 | 0.40 | 0.45 | 0.50 | 0.60 | 0.70 | 0.80 | 0.90 | 1.0 |
|                    | <i>Z</i> <sub>4PIC</sub> | 0.04 | -    | 0.09 | 0.18 | 0.27 | 0.90 | 0.93 | -    | -    | -    | -    | 1.0 |

Table 3S. <sup>1</sup>H-NMR values of three-guest competition experiment, **H.2PIC/3PIC/4PIC**

| Name of the experiment | *Mole fraction | 2PIC | 3PIC | 4PIC | Structure   | Comment                                 |
|------------------------|----------------|------|------|------|-------------|-----------------------------------------|
| A                      | $Z_{Sol}$      | 0.60 | 0.20 | 0.20 | <b>IX</b>   | Same as <b>III</b><br>( <b>H.4PIC</b> ) |
|                        | $X_{NMR}$      | 0.12 | 0.09 | 0.78 |             |                                         |
| B                      | $Z_{Sol}$      | 0.40 | 0.40 | 0.20 |             |                                         |
|                        | $X_{NMR}$      | 0.03 | 0.20 | 0.77 |             |                                         |
| C                      | $Z_{Sol}$      | 0.40 | 0.20 | 0.40 |             |                                         |
|                        | $X_{NMR}$      | 0.03 | 0.08 | 0.89 |             |                                         |
| D                      | $Z_{Sol}$      | 0.20 | 0.60 | 0.20 | <b>VIII</b> | Same as <b>II</b><br>( <b>H.3PIC</b> )  |
|                        | $X_{NMR}$      | 0.01 | 0.82 | 0.17 |             |                                         |
| E                      | $Z_{Sol}$      | 0.20 | 0.40 | 0.40 |             |                                         |
|                        | $X_{NMR}$      | 0.01 | 0.11 | 0.88 |             |                                         |
| F                      | $Z_{Sol}$      | 0.20 | 0.20 | 0.60 |             |                                         |
|                        | $X_{NMR}$      | 0.01 | 0.07 | 0.92 |             |                                         |
| G                      | $Z_{Sol}$      | 0.33 | 0.33 | 0.33 |             |                                         |
|                        | $X_{NMR}$      | 0.02 | 0.11 | 0.86 |             |                                         |

\* $Z_{Sol}$  = Mole fraction in solution mixture,  $X_{NMR}$  = Mole fraction in crystals, obtained by <sup>1</sup>H-NMR

1. HOST (H)

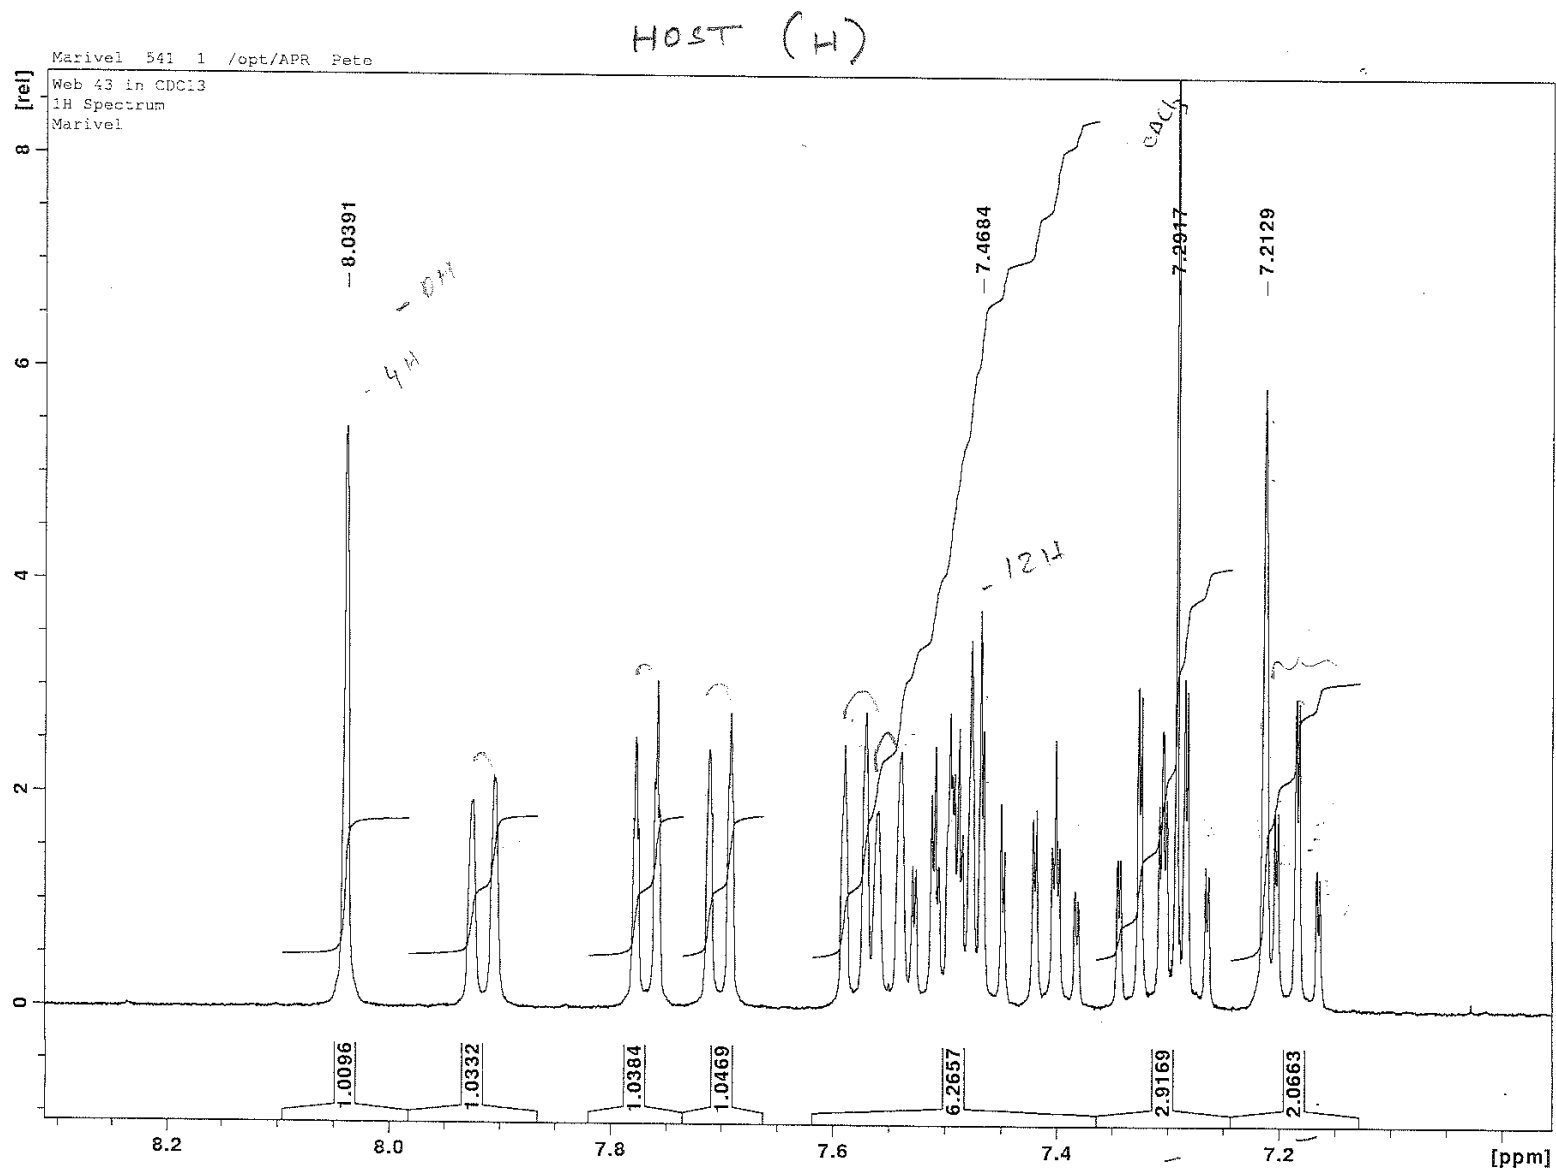

<sup>1</sup>H-NMR (400 MHz) spectrum of **Host (H)** in CDCl<sub>3</sub> at 25°C

## 2. H.2PIC (I)

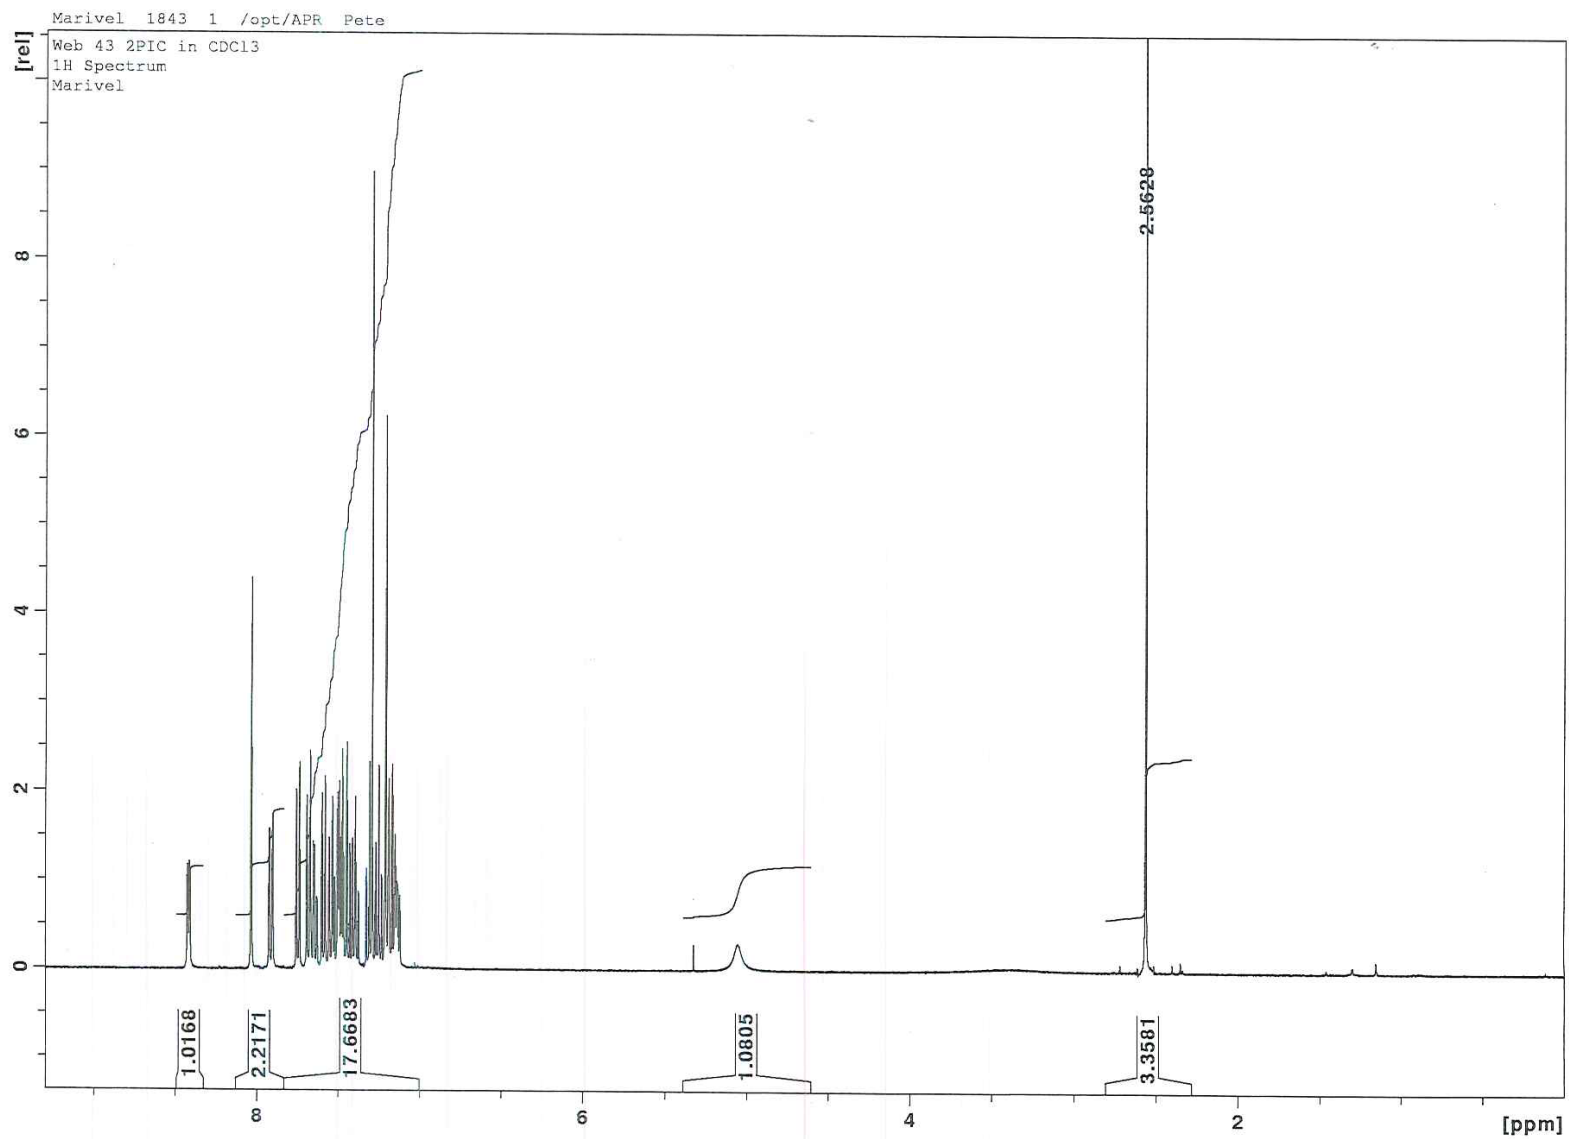

<sup>1</sup>H-NMR (400 MHz) spectrum of **H.2PIC (I)** in CDCl<sub>3</sub> at 25°C





#### 4. H.4PIC

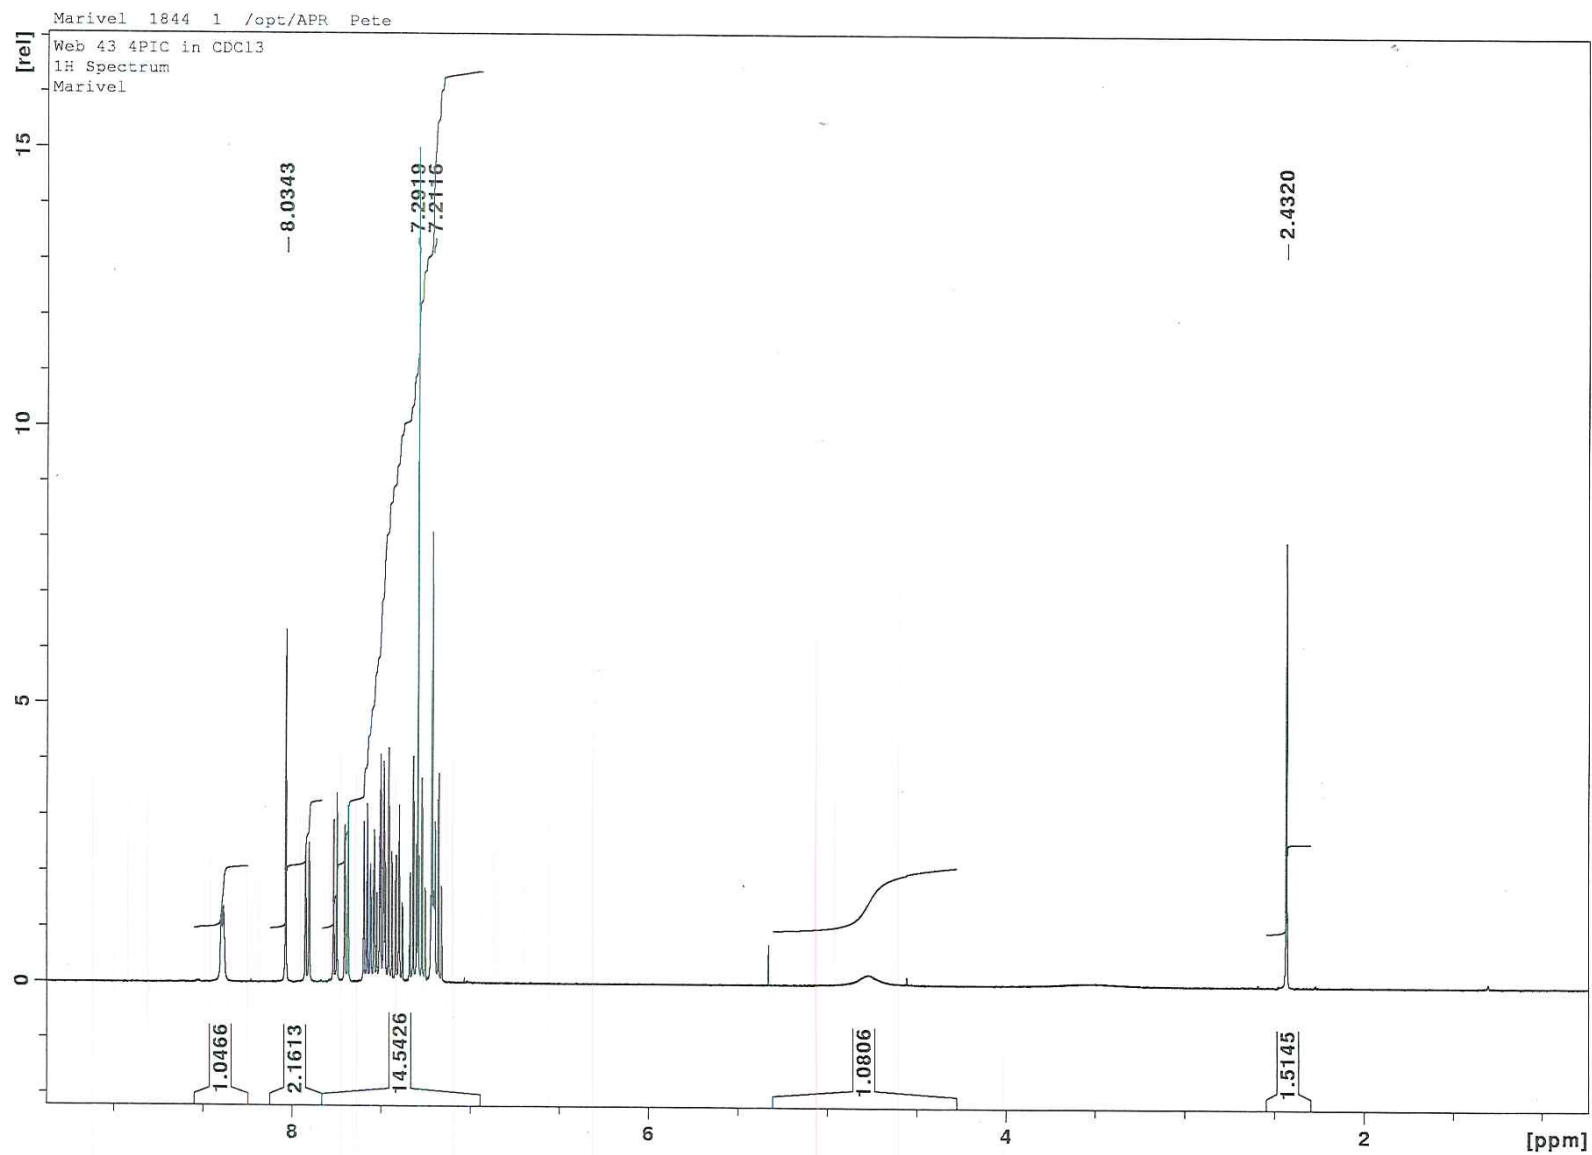

$^1\text{H-NMR}$  (400 MHz) spectrum of **H.4PIC (III)** in  $\text{CDCl}_3$  at  $25^\circ\text{C}$

1a. H.2PIC/3PIC (0.1:0.9)

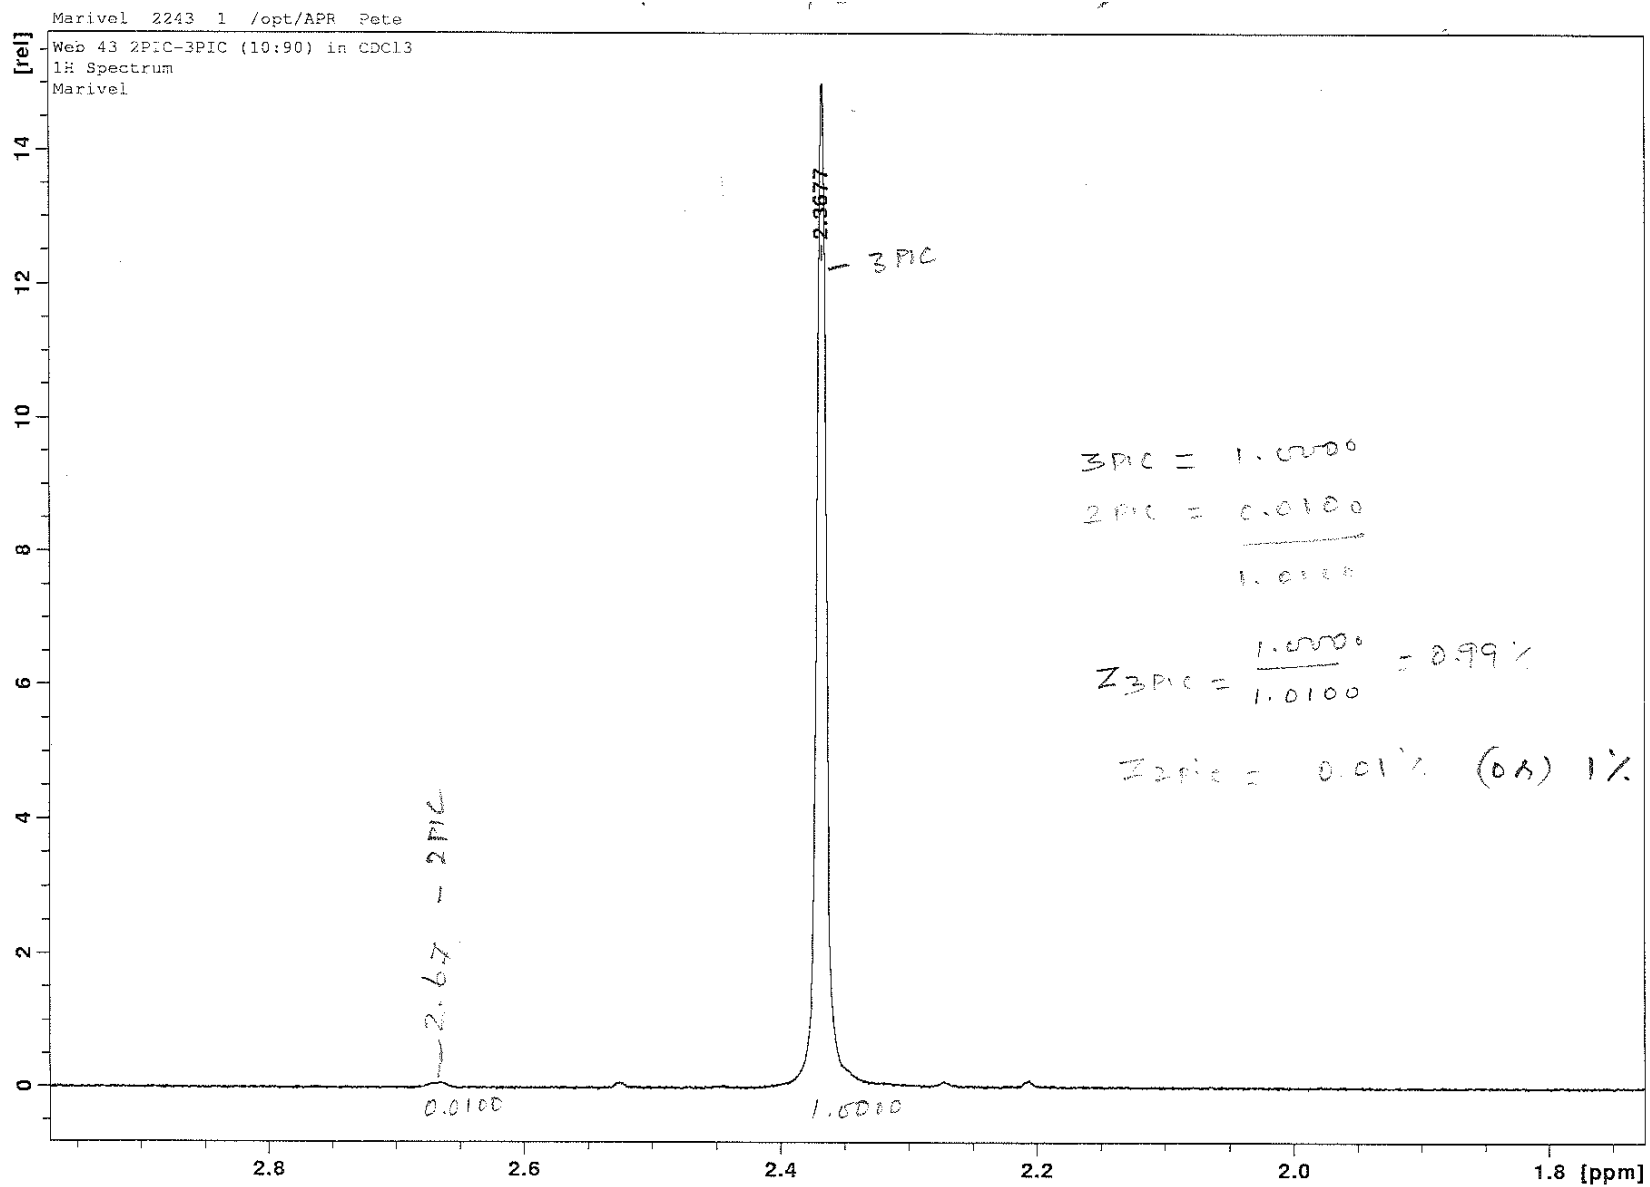

<sup>1</sup>H-NMR (400 MHz) spectrum of H.2PIC/3PIC (0.1:0.9) in CDCl<sub>3</sub> at 25°C

1b. H.2PIC/3PIC (0.2:0.8)

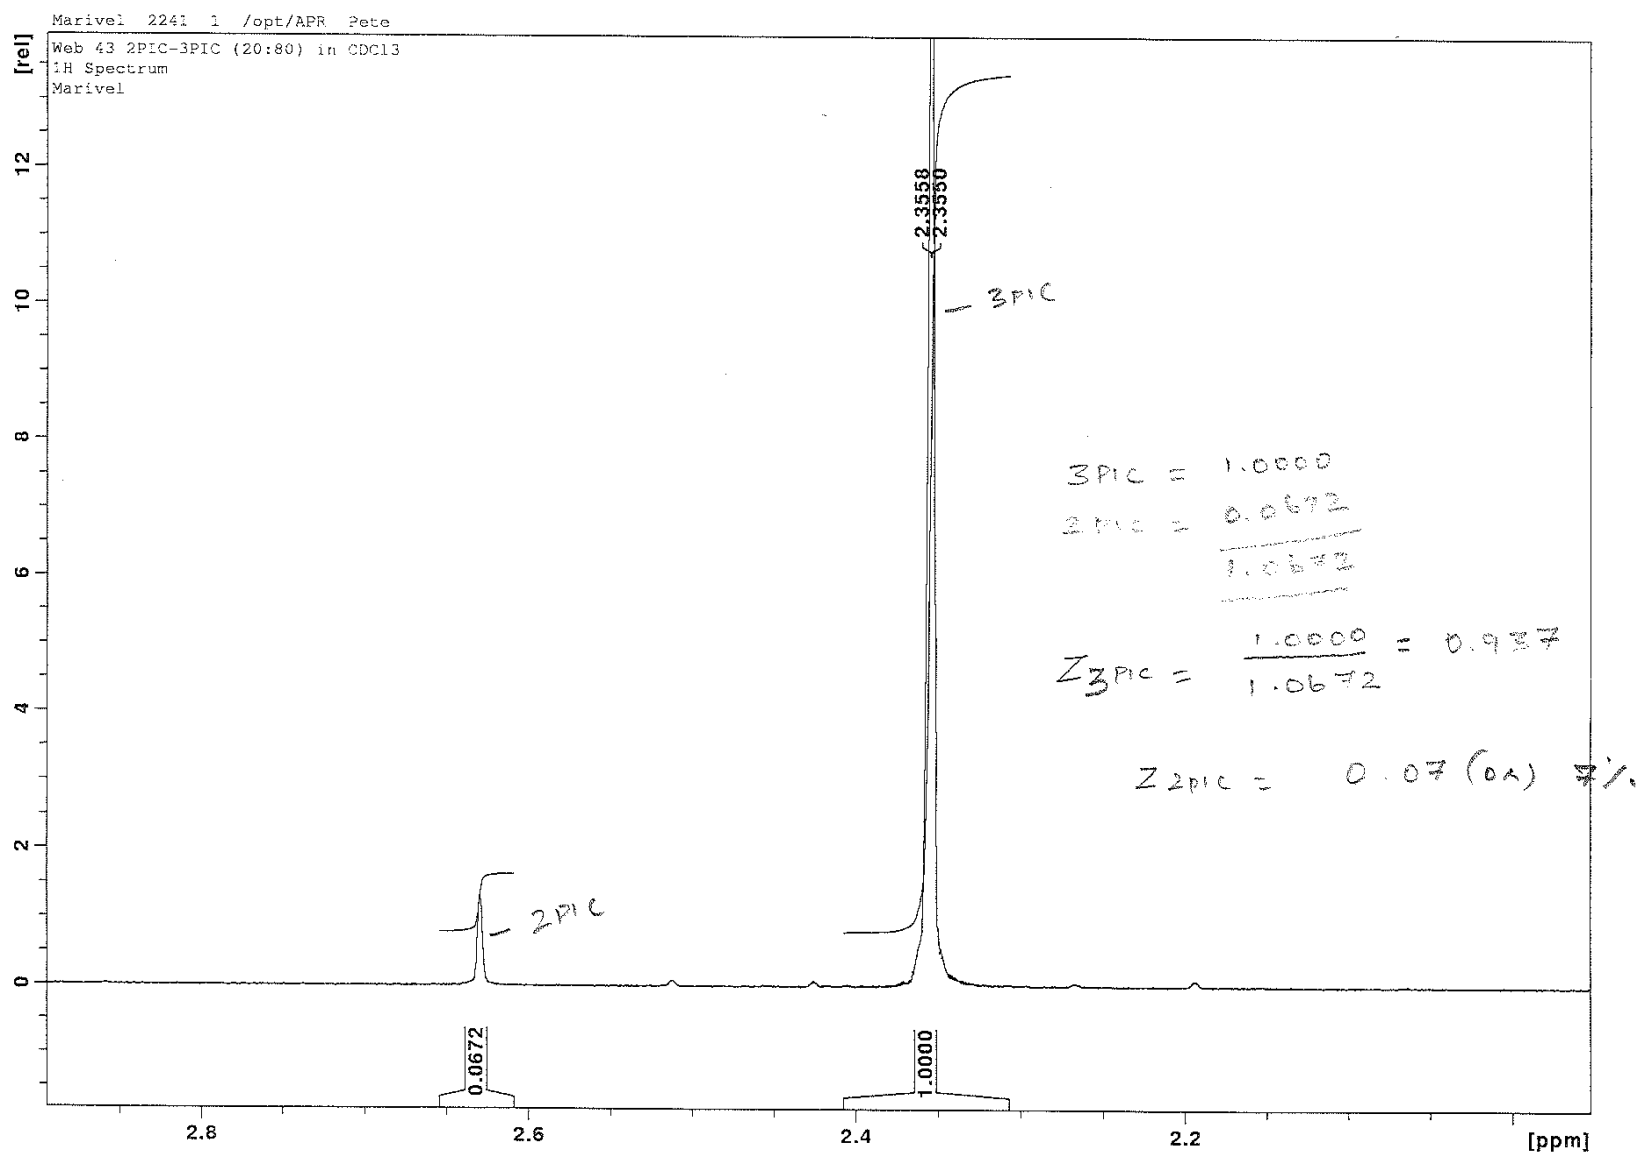

<sup>1</sup>H-NMR (400 MHz) spectrum of H.2PIC/3PIC (0.2:0.8) in CDCl<sub>3</sub> at 25°C

1c. H.2PIC/3PIC (0.3:0.7)

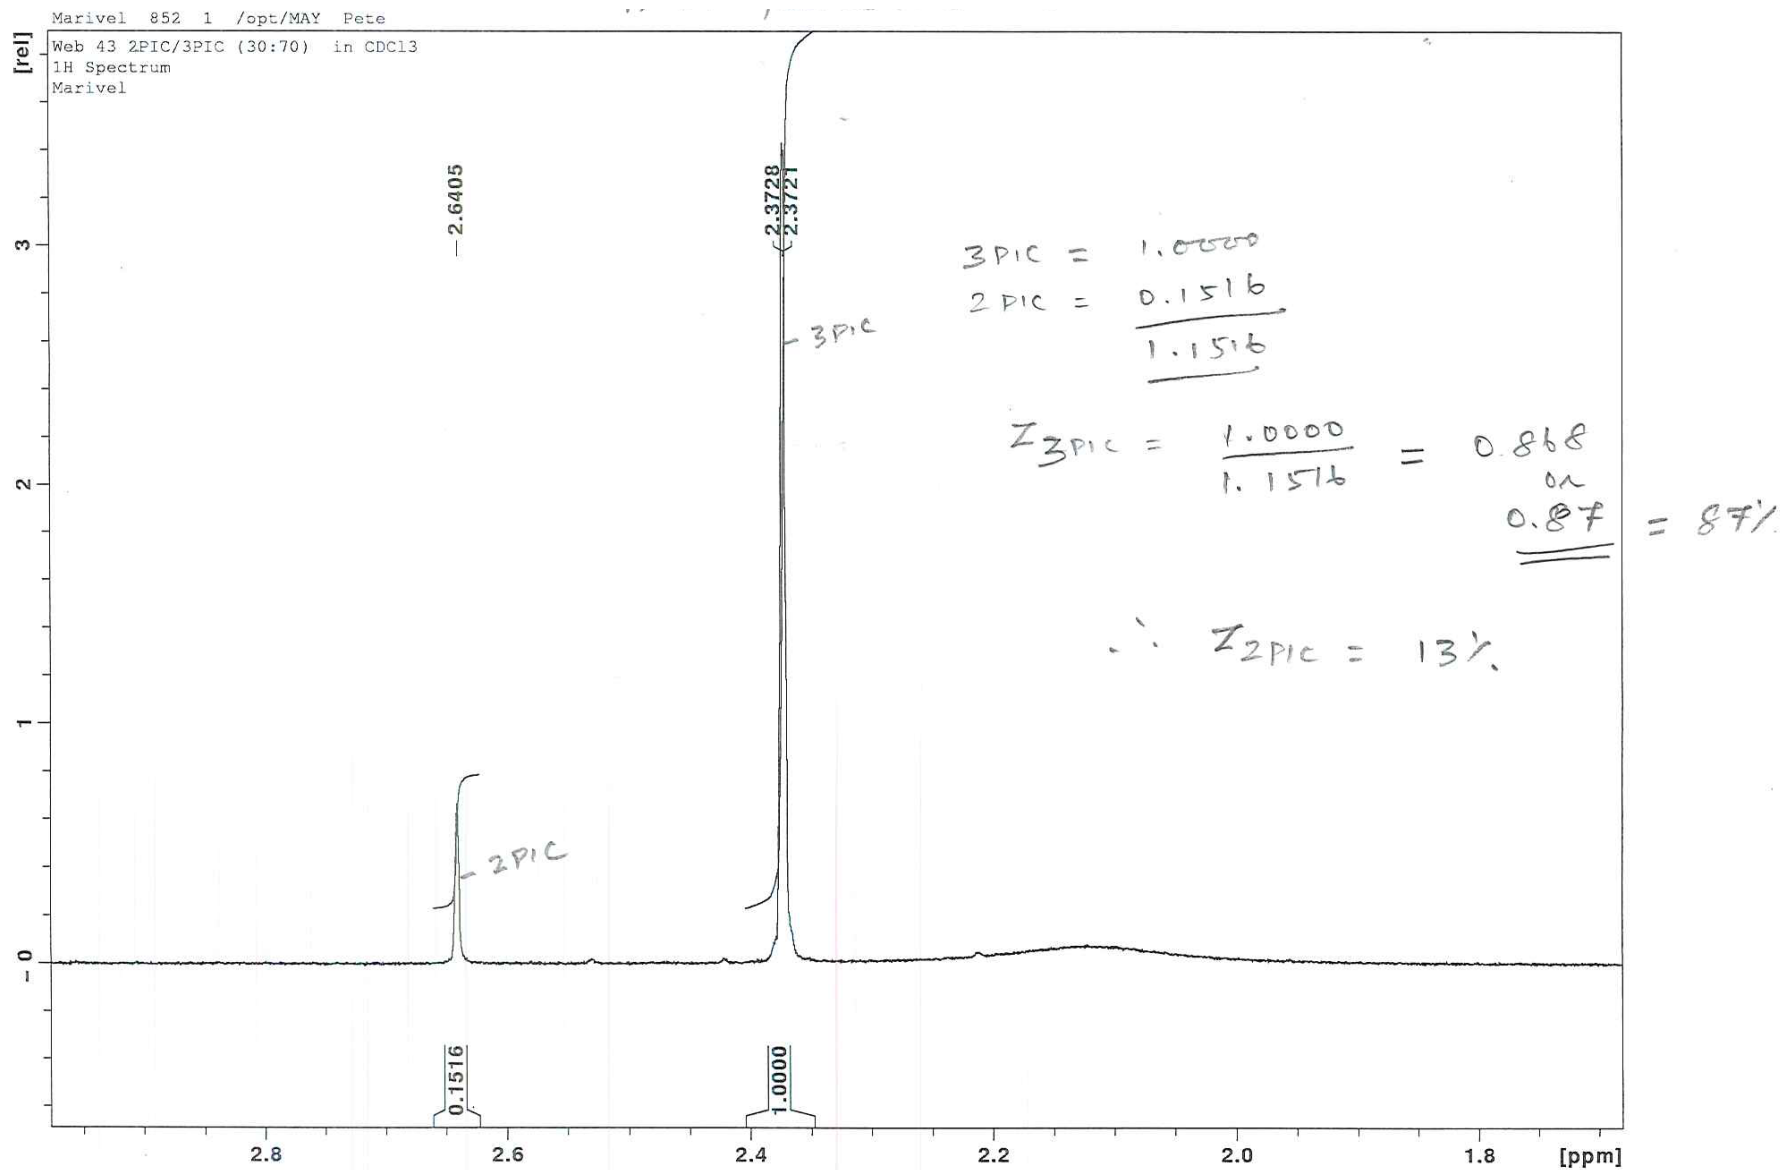

<sup>1</sup>H-NMR (400 MHz) spectrum of H.2PIC/3PIC (0.3:0.7) in CDCl<sub>3</sub> at 25°C

1d. H.2PIC/3PIC (0.4:0.6)

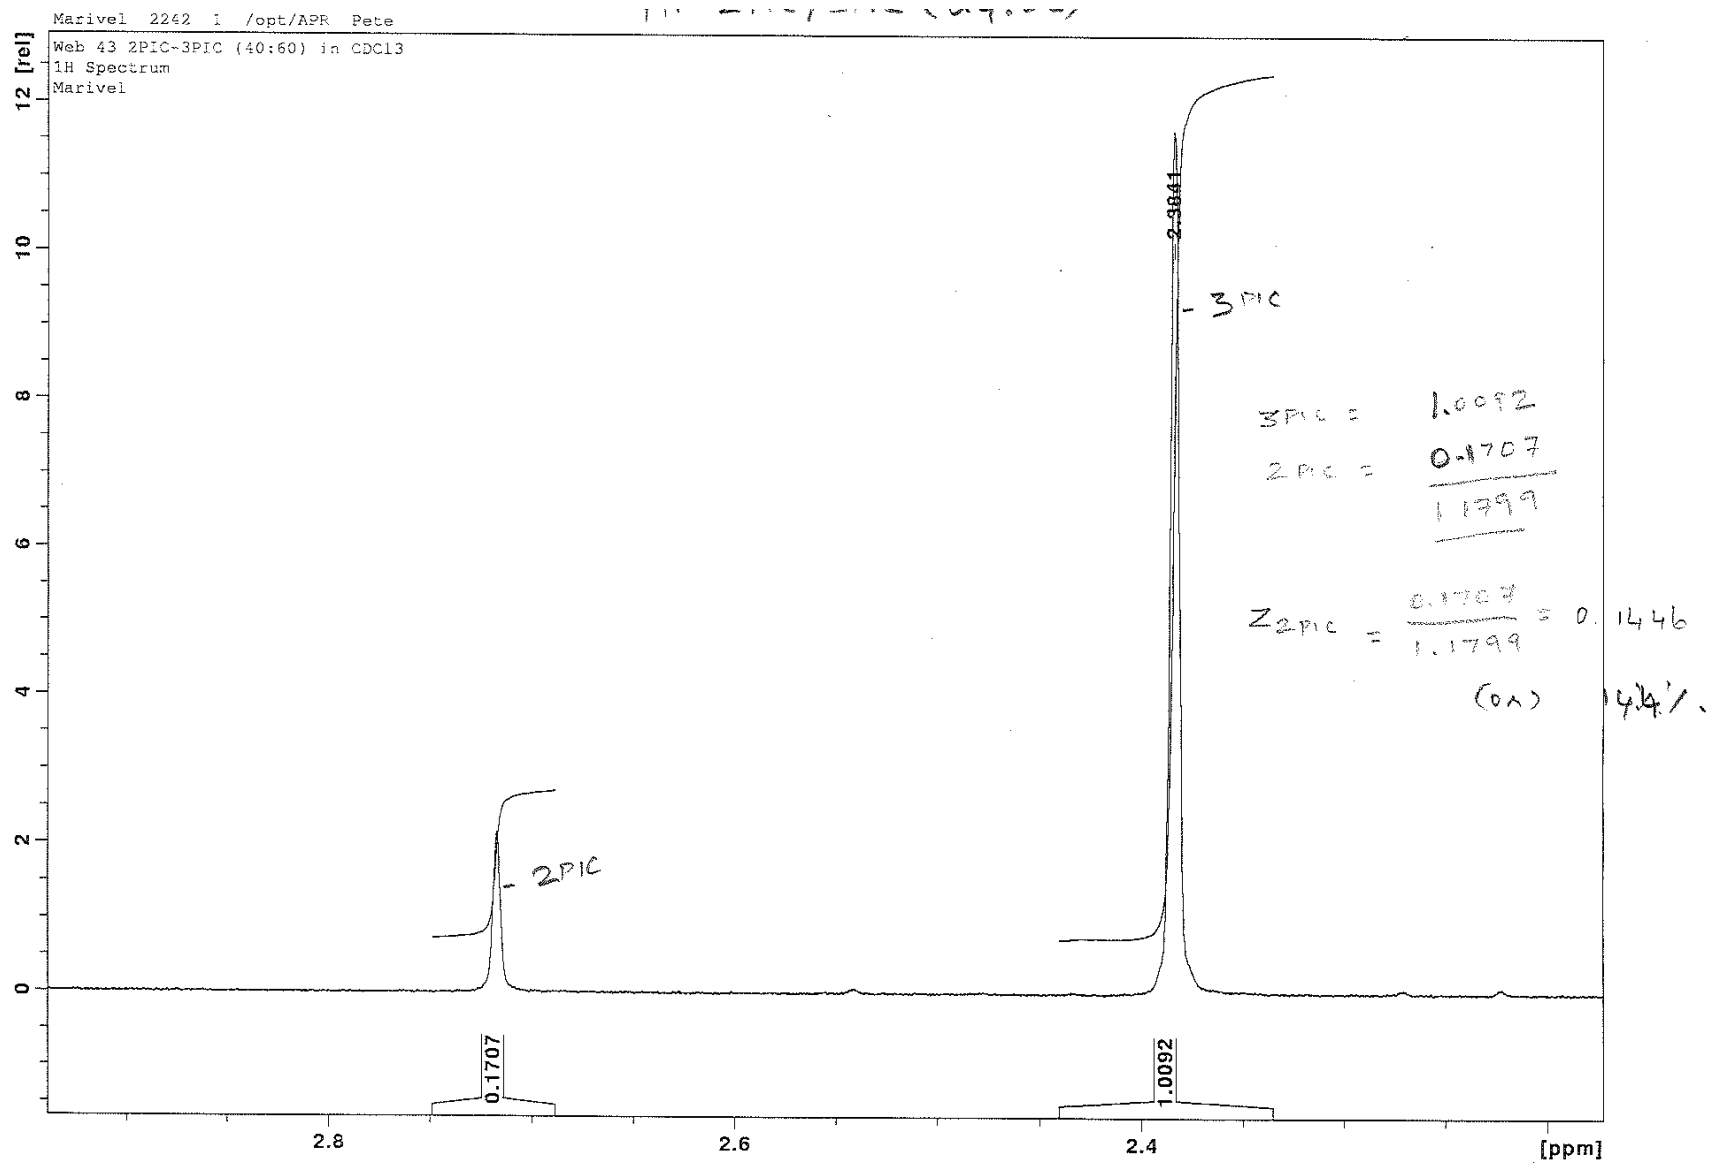

<sup>1</sup>H-NMR (400 MHz) spectrum of H.2PIC/3PIC (0.4:0.6) in CDCl<sub>3</sub> at 25°C

1e. H.2PIC/3PIC (0.5:0.5)

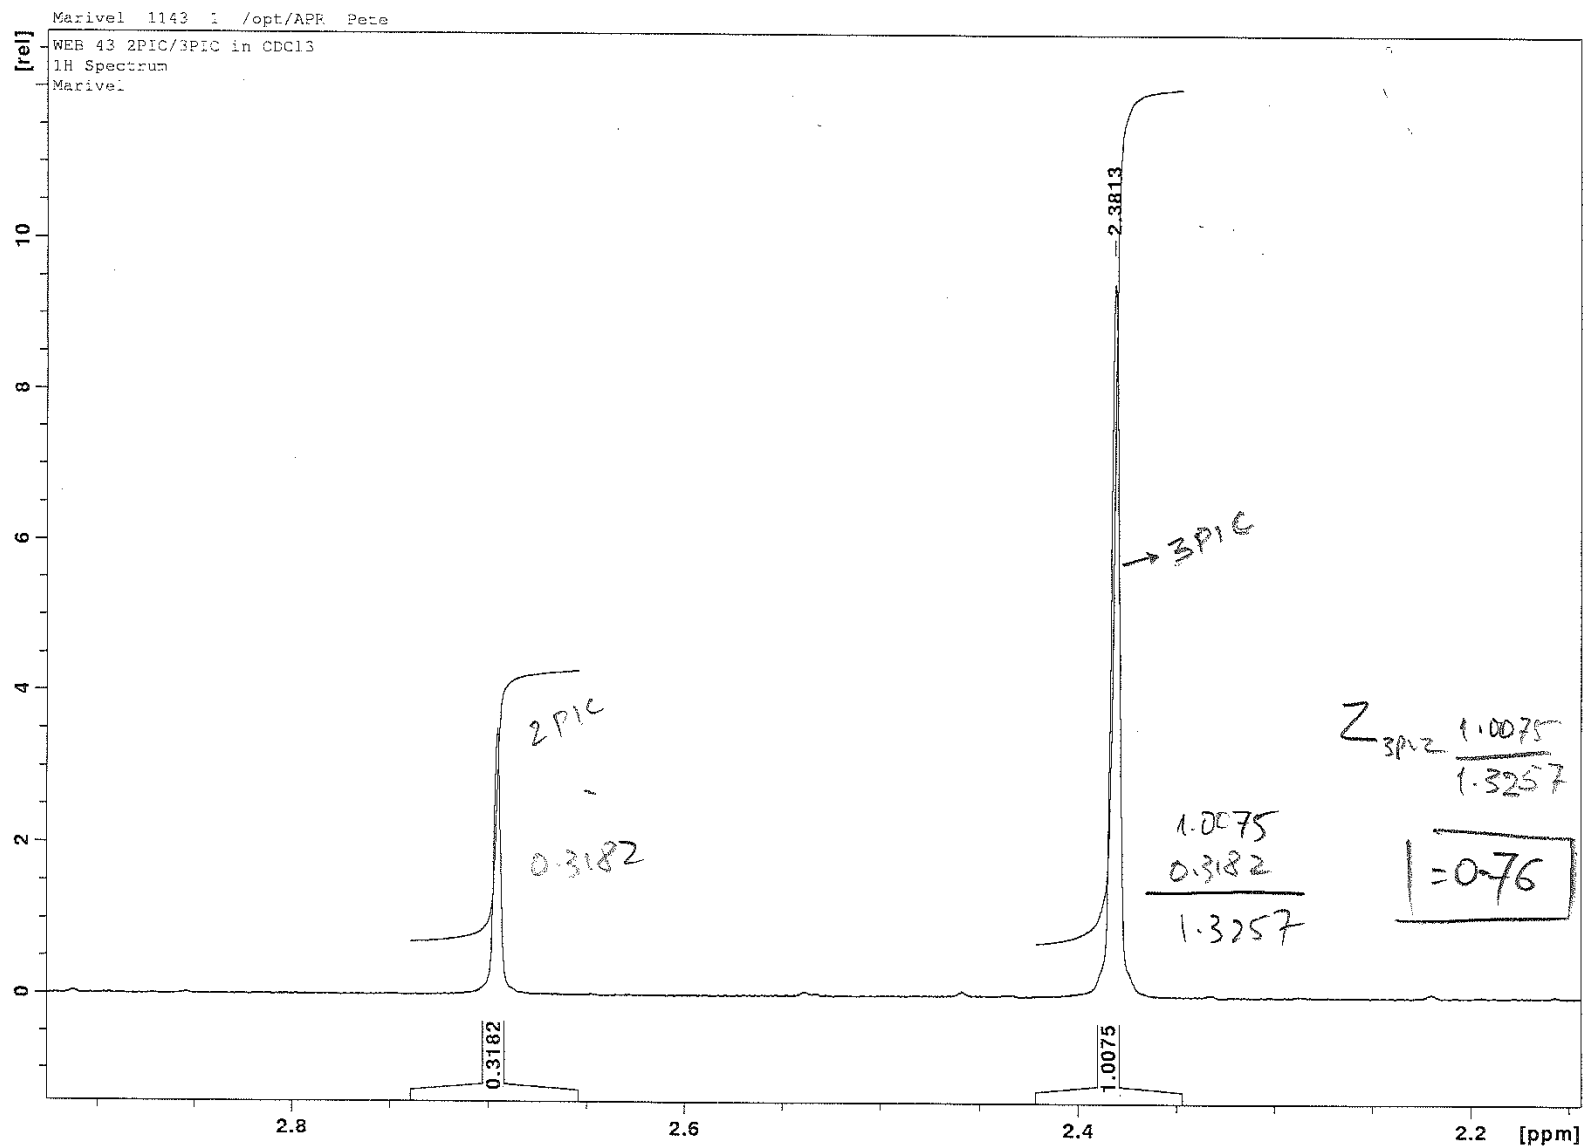

<sup>1</sup>H-NMR (400 MHz) spectrum of H.2PIC/3PIC (0.5:0.5) in CDCl<sub>3</sub> at 25°C

1f. H.2PIC/3PIC (0.6:0.4) - V

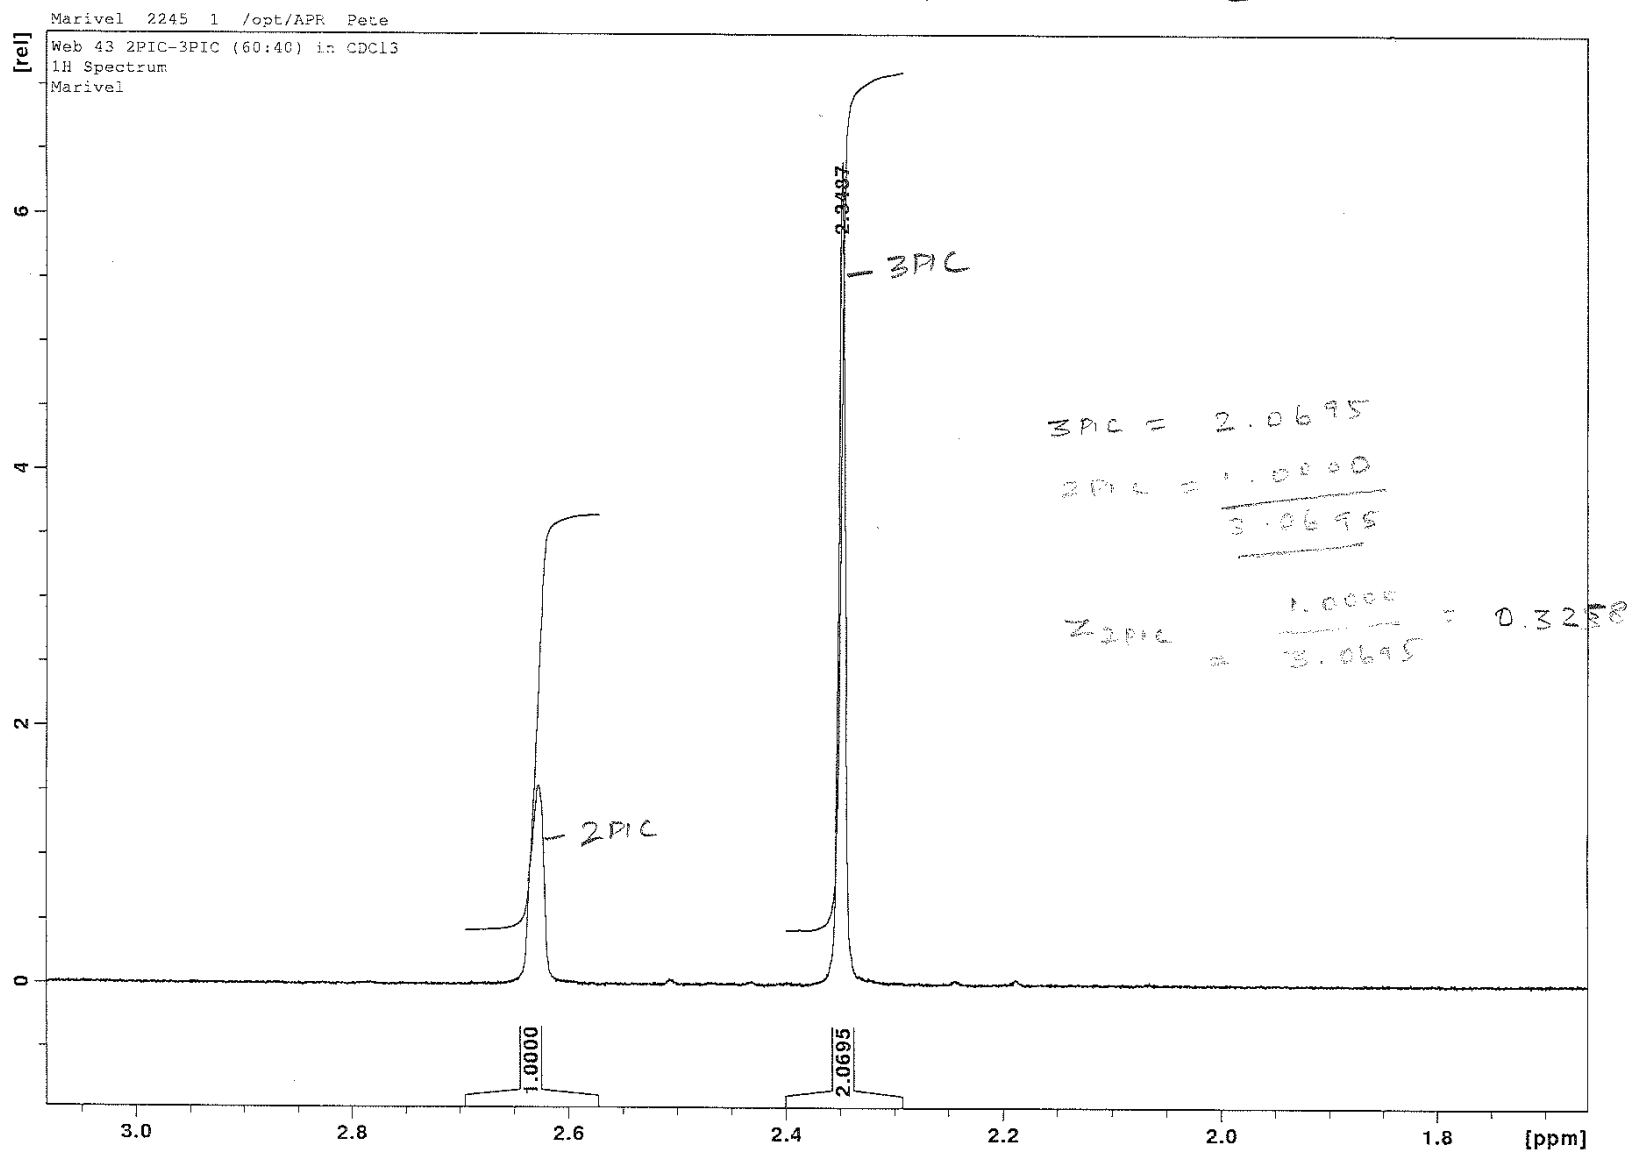

<sup>1</sup>H-NMR (400 MHz) spectrum of H.2PIC/3PIC (0.6:0.4) in CDCl<sub>3</sub> at 25°C

1g. H.2PIC/3PIC (0.7:0.3) - IV

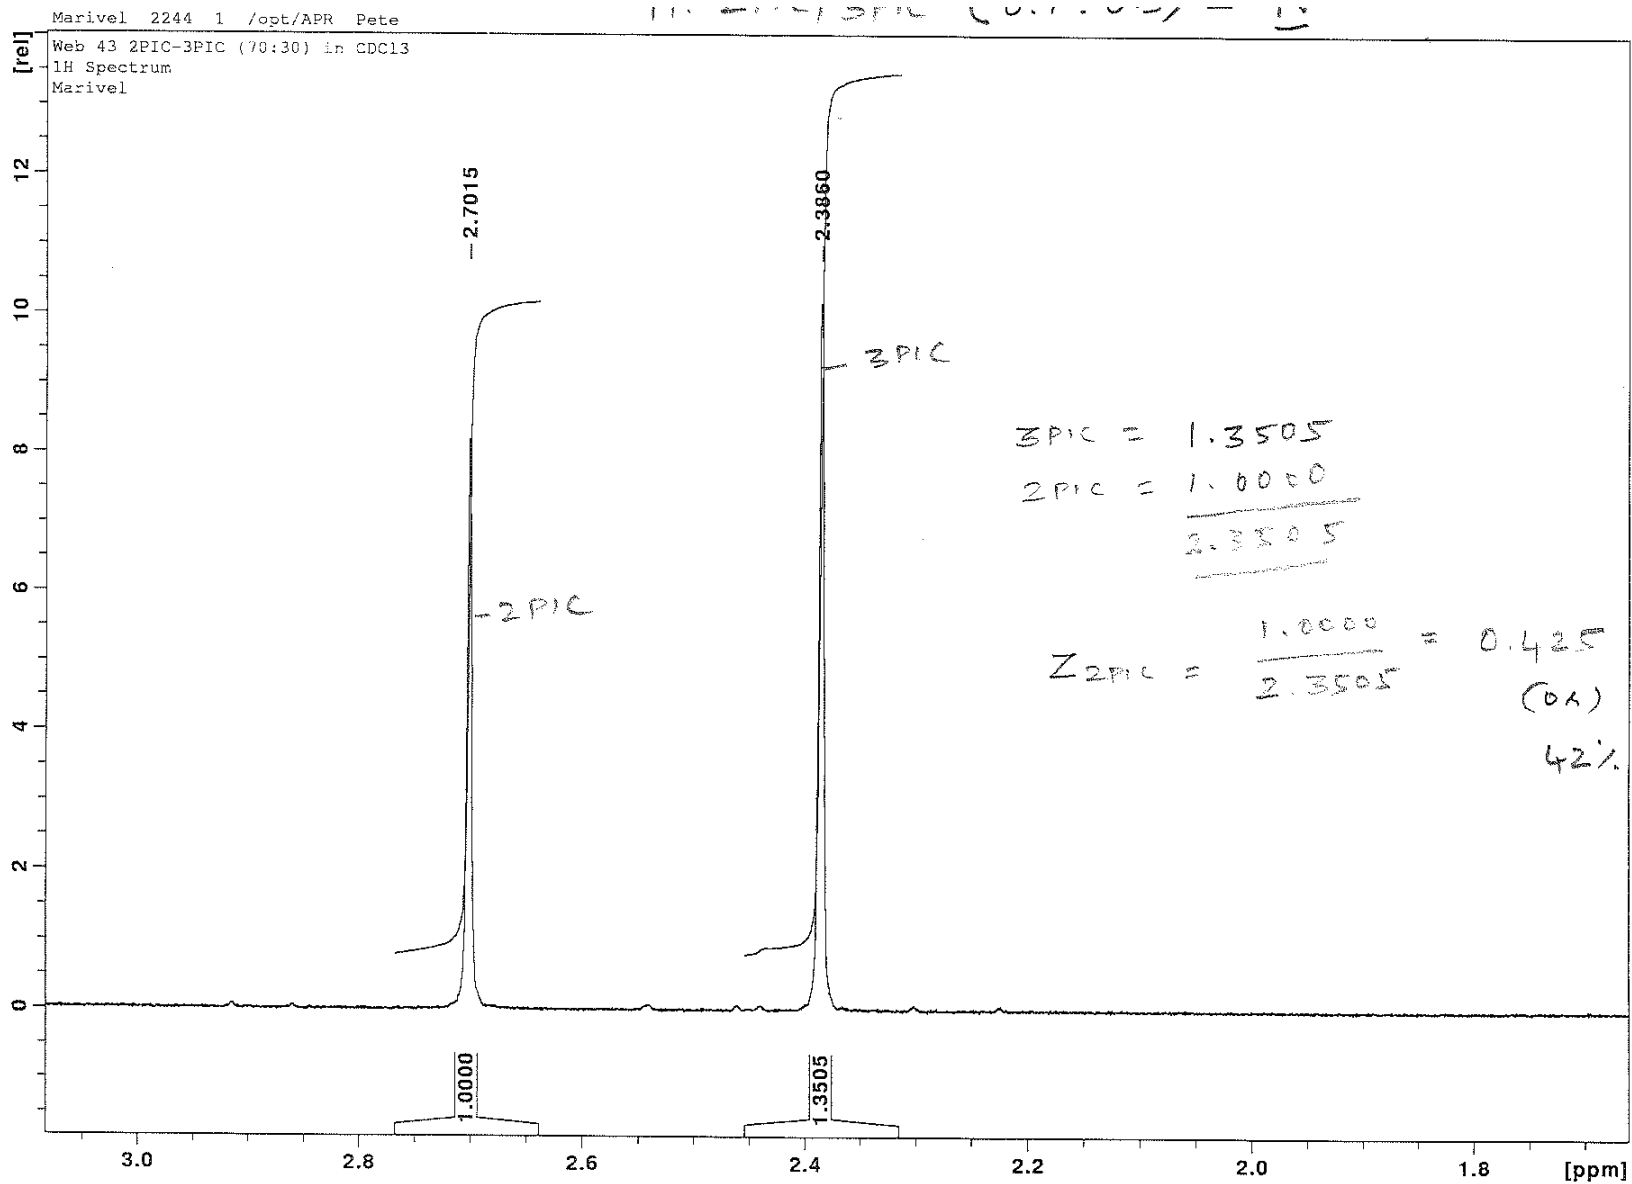

<sup>1</sup>H-NMR (400 MHz) spectrum of H.2PIC/3PIC (0.7:0.3) in CDCl<sub>3</sub> at 25°C



1h. H.2PIC/3PIC (0.8:0.2)

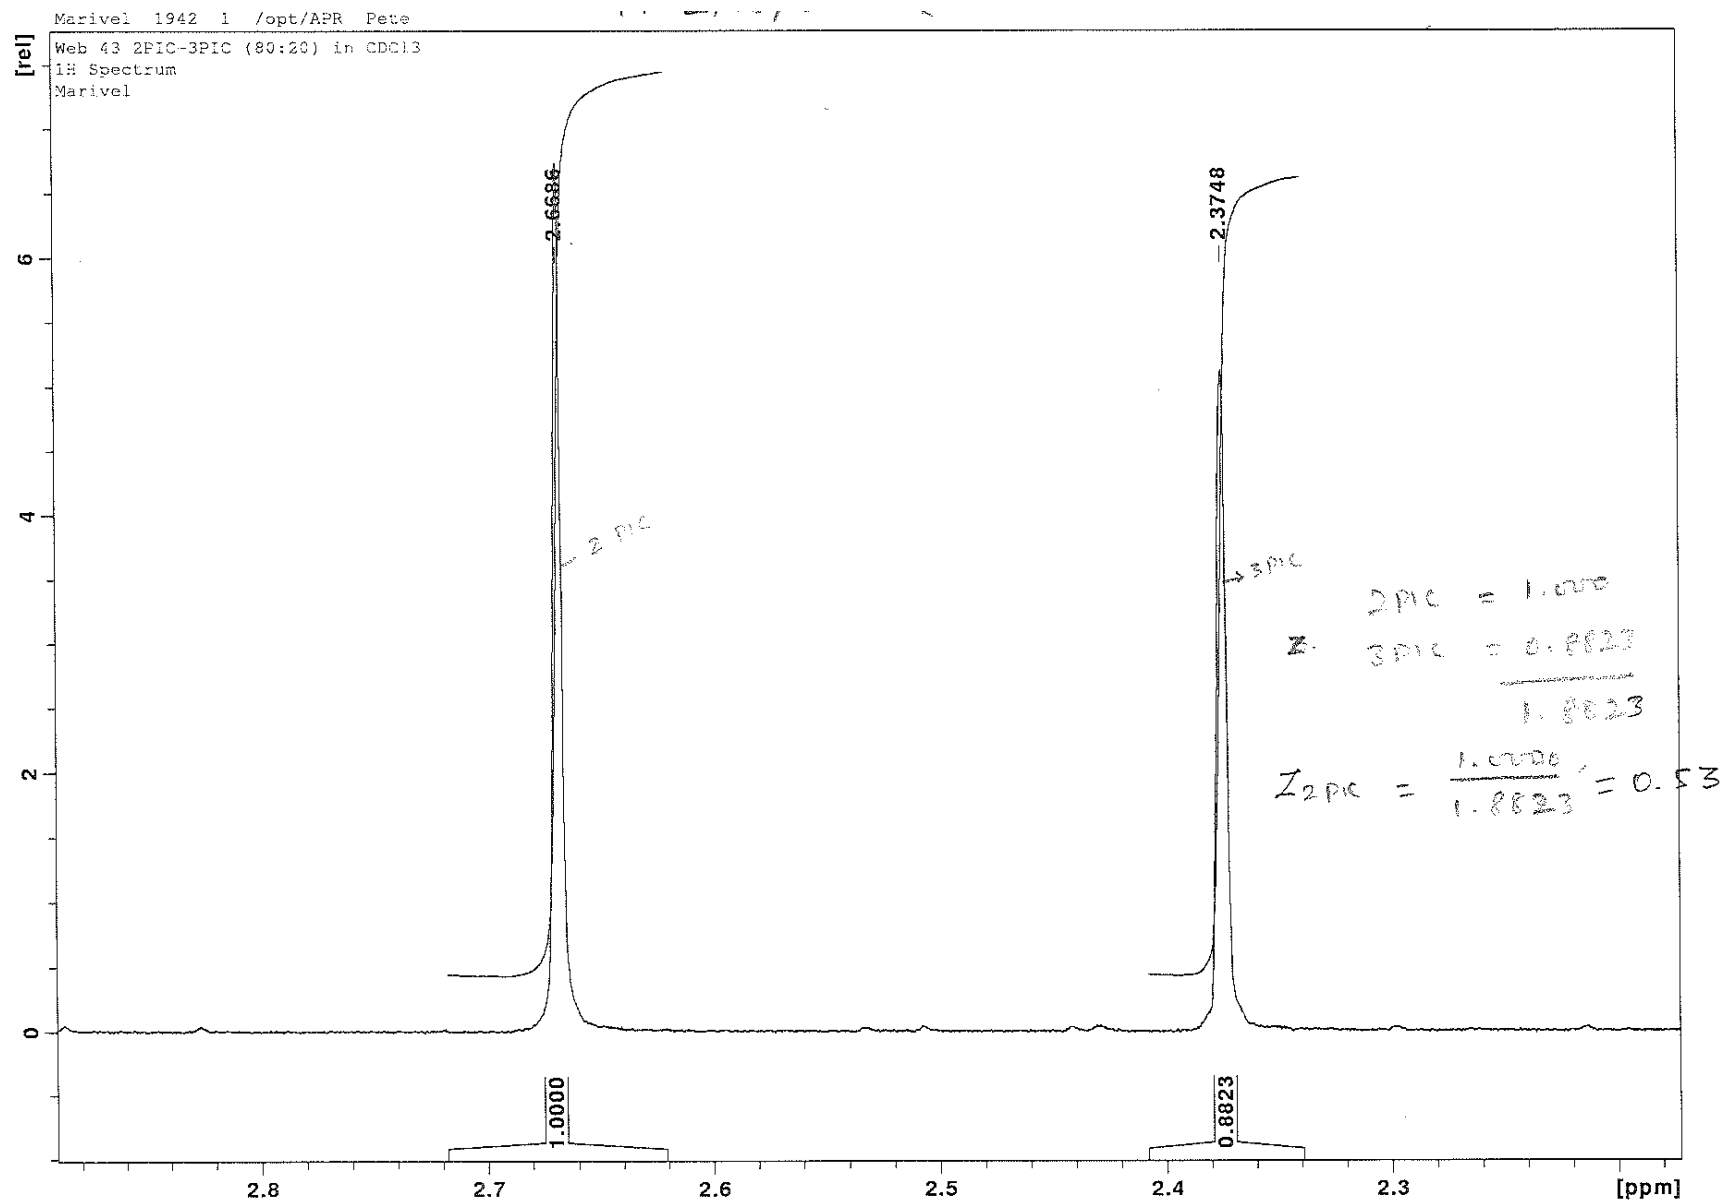

<sup>1</sup>H-NMR (400 MHz) spectrum of H.2PIC/3PIC (0.8:0.2) in CDCl<sub>3</sub> at 25°C

1i. H.2PIC/3PIC (0.9:0.1)

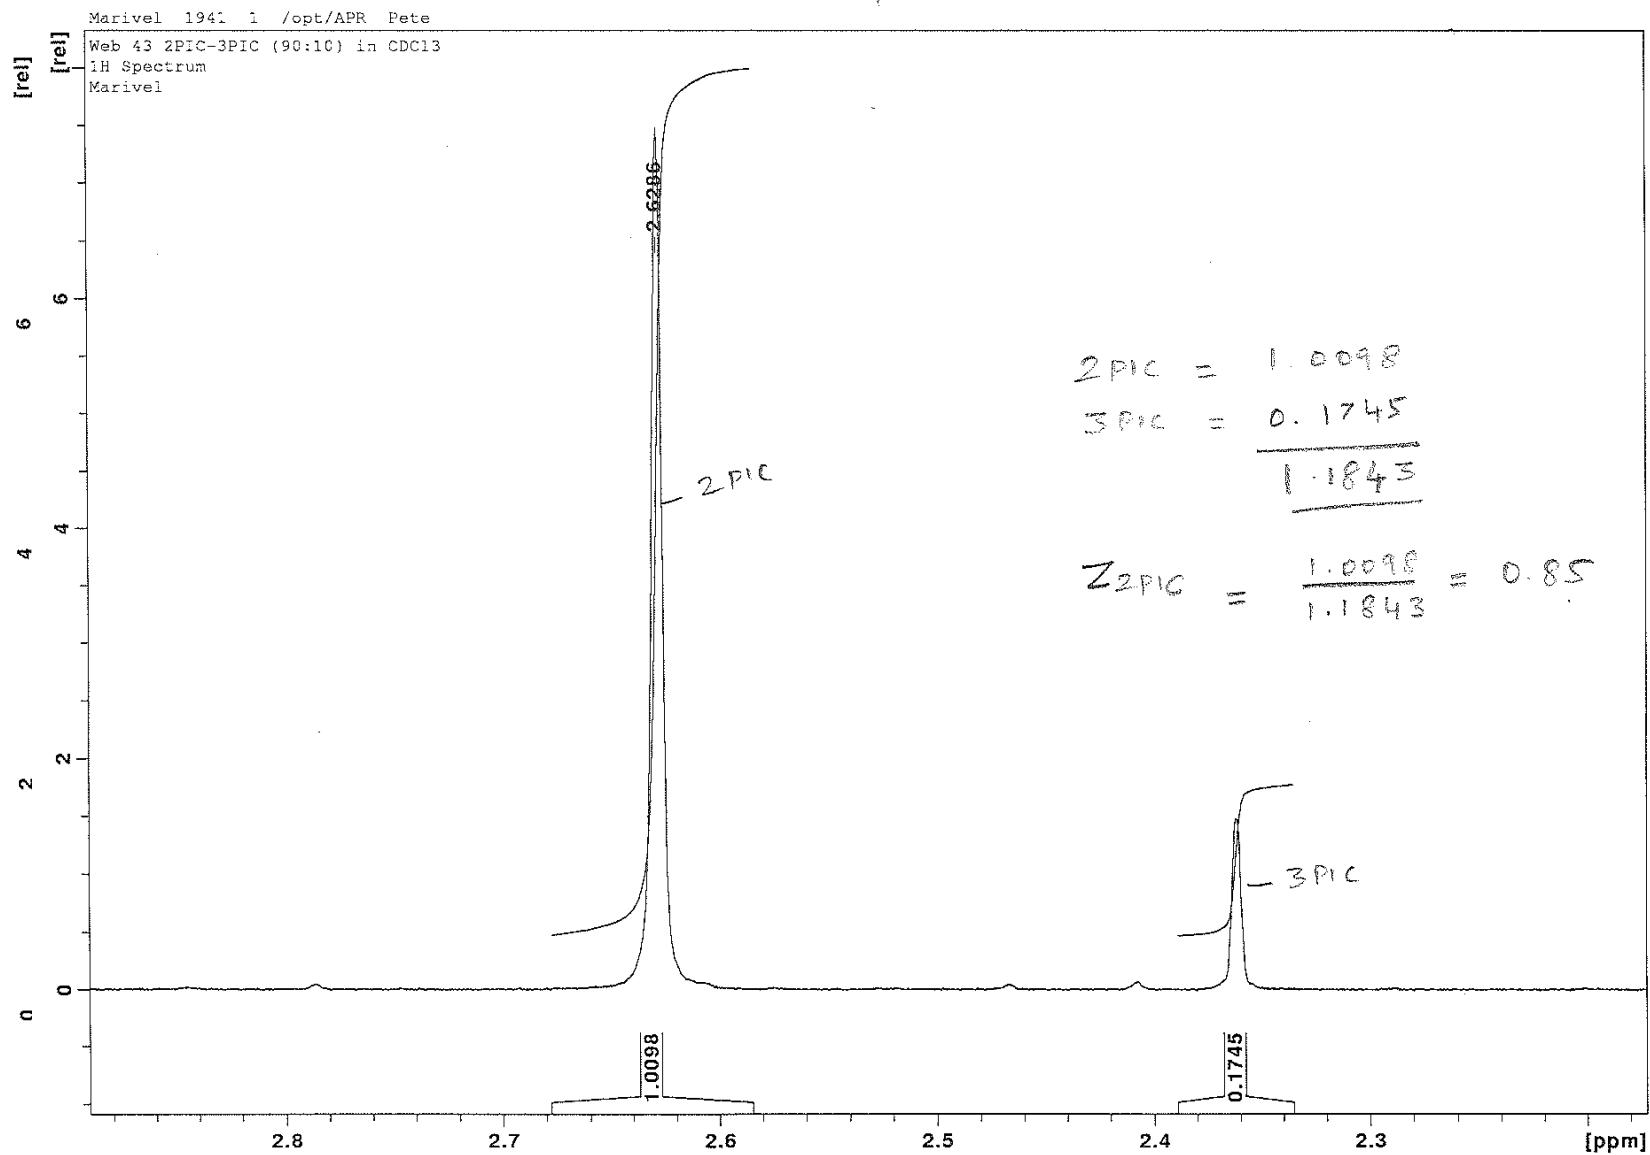

<sup>1</sup>H-NMR (400 MHz) spectrum of H.2PIC/3PIC (0.9:0.1) in CDCl<sub>3</sub> at 25°C

2a. H.2PIC/4PIC (0.4:0.6)

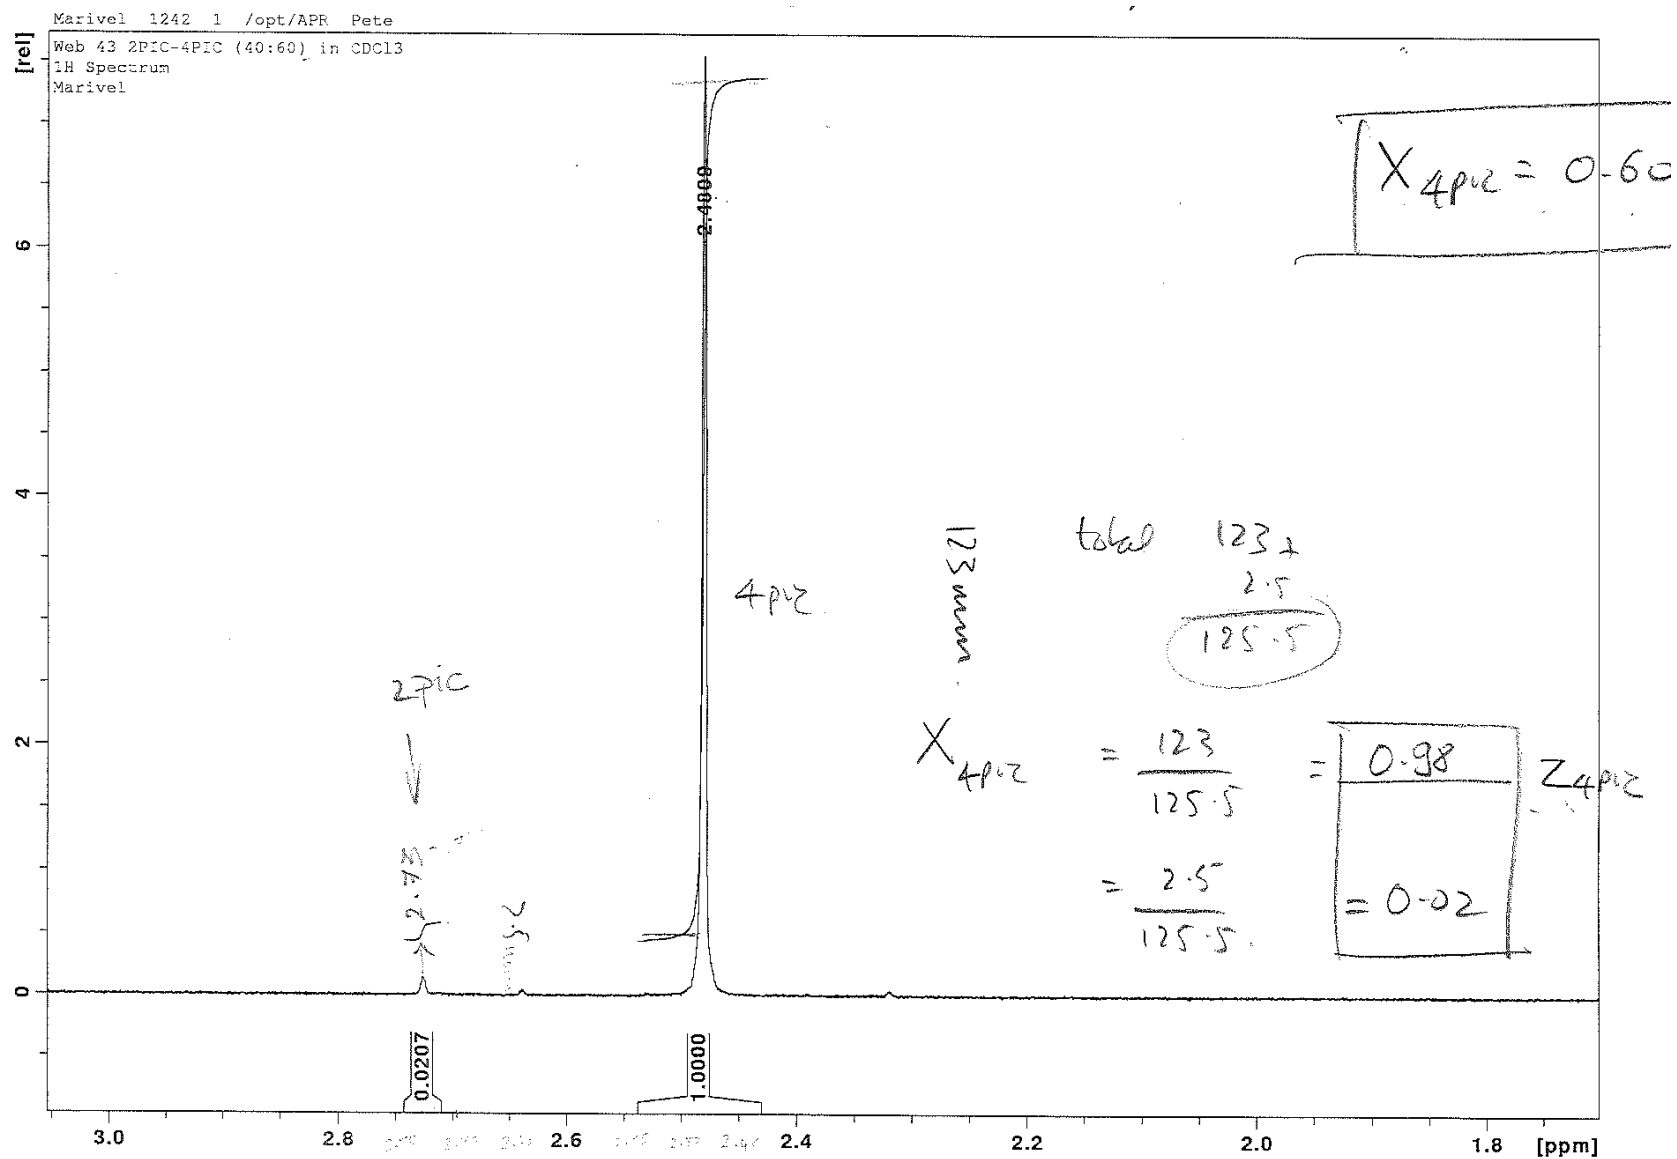

<sup>1</sup>H-NMR (400 MHz) spectrum of H.2PIC/4PIC (0.4:0.6) in CDCl<sub>3</sub> at 25°C

2b. H.2PIC/4PIC (0.5:0.5)

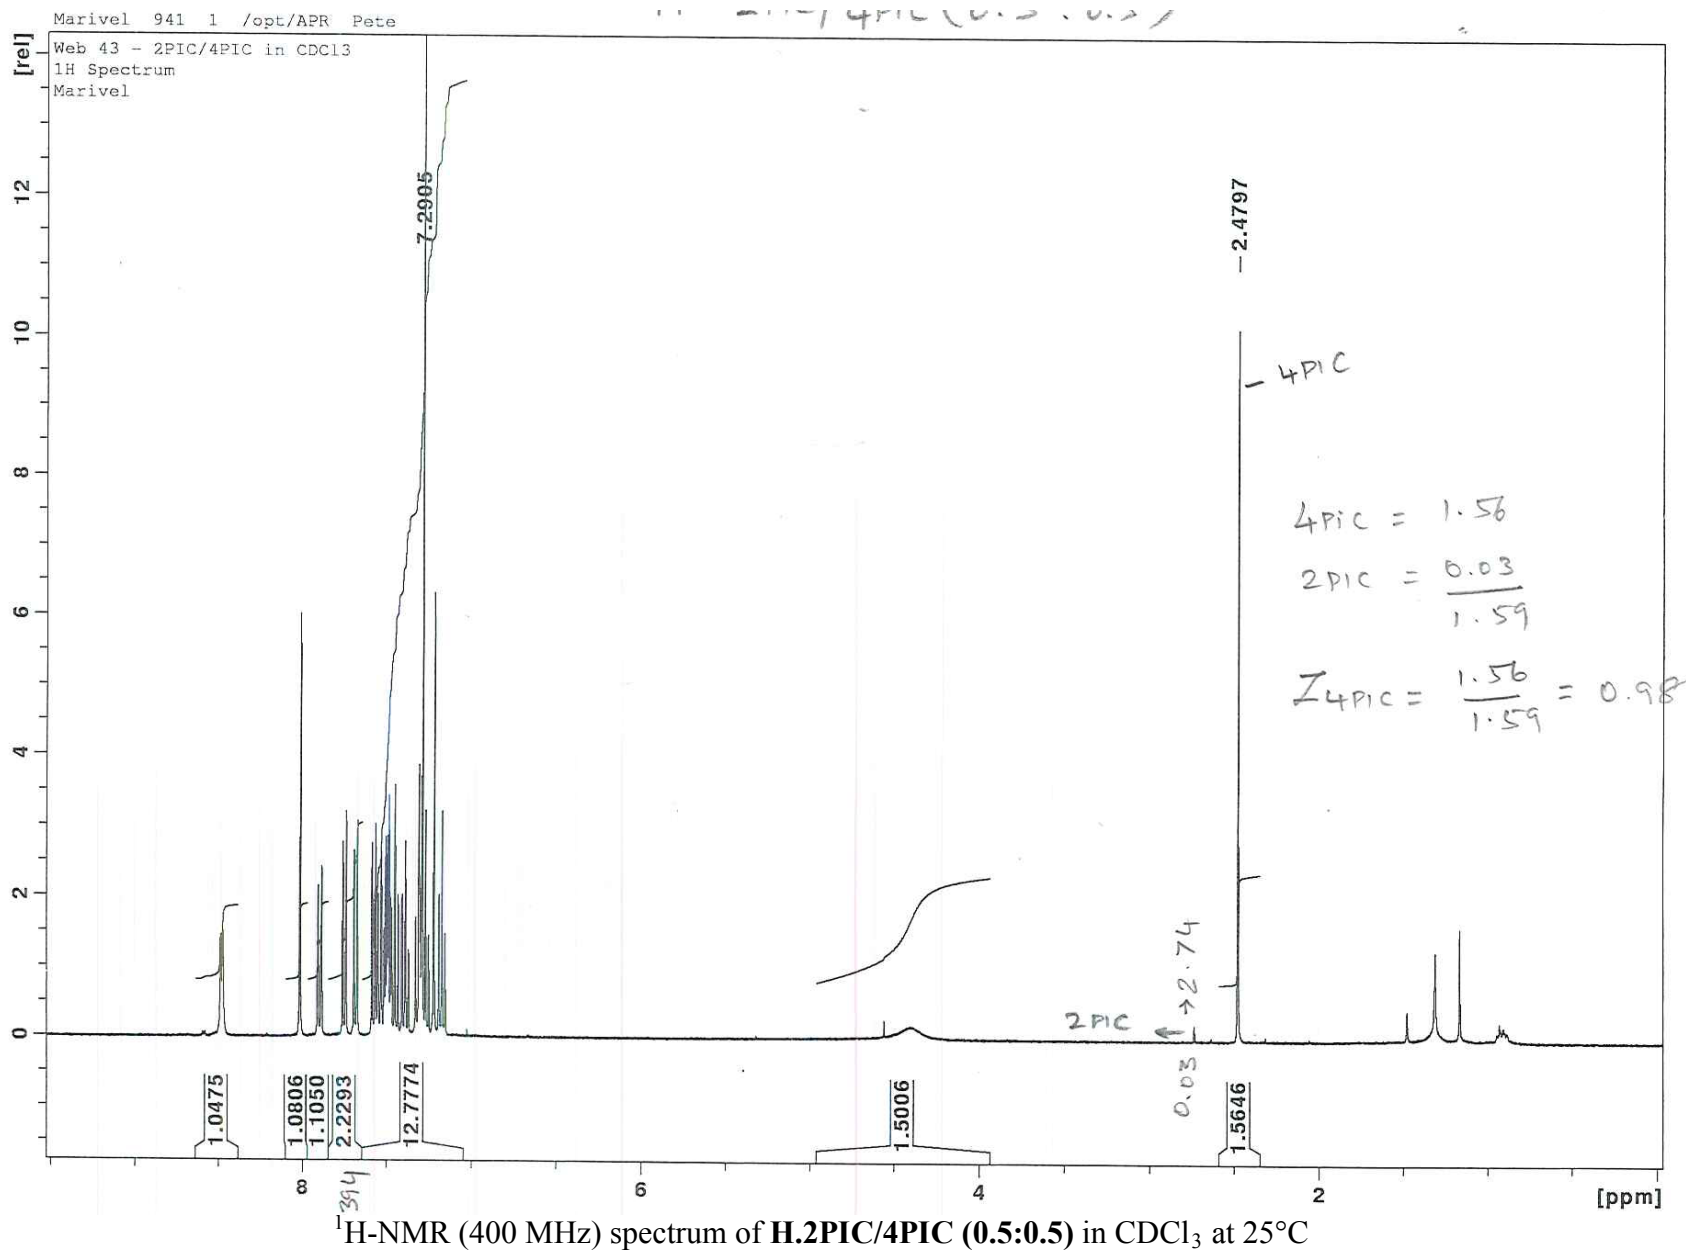

2c. H.2PIC/4PIC (0.6:0.4)

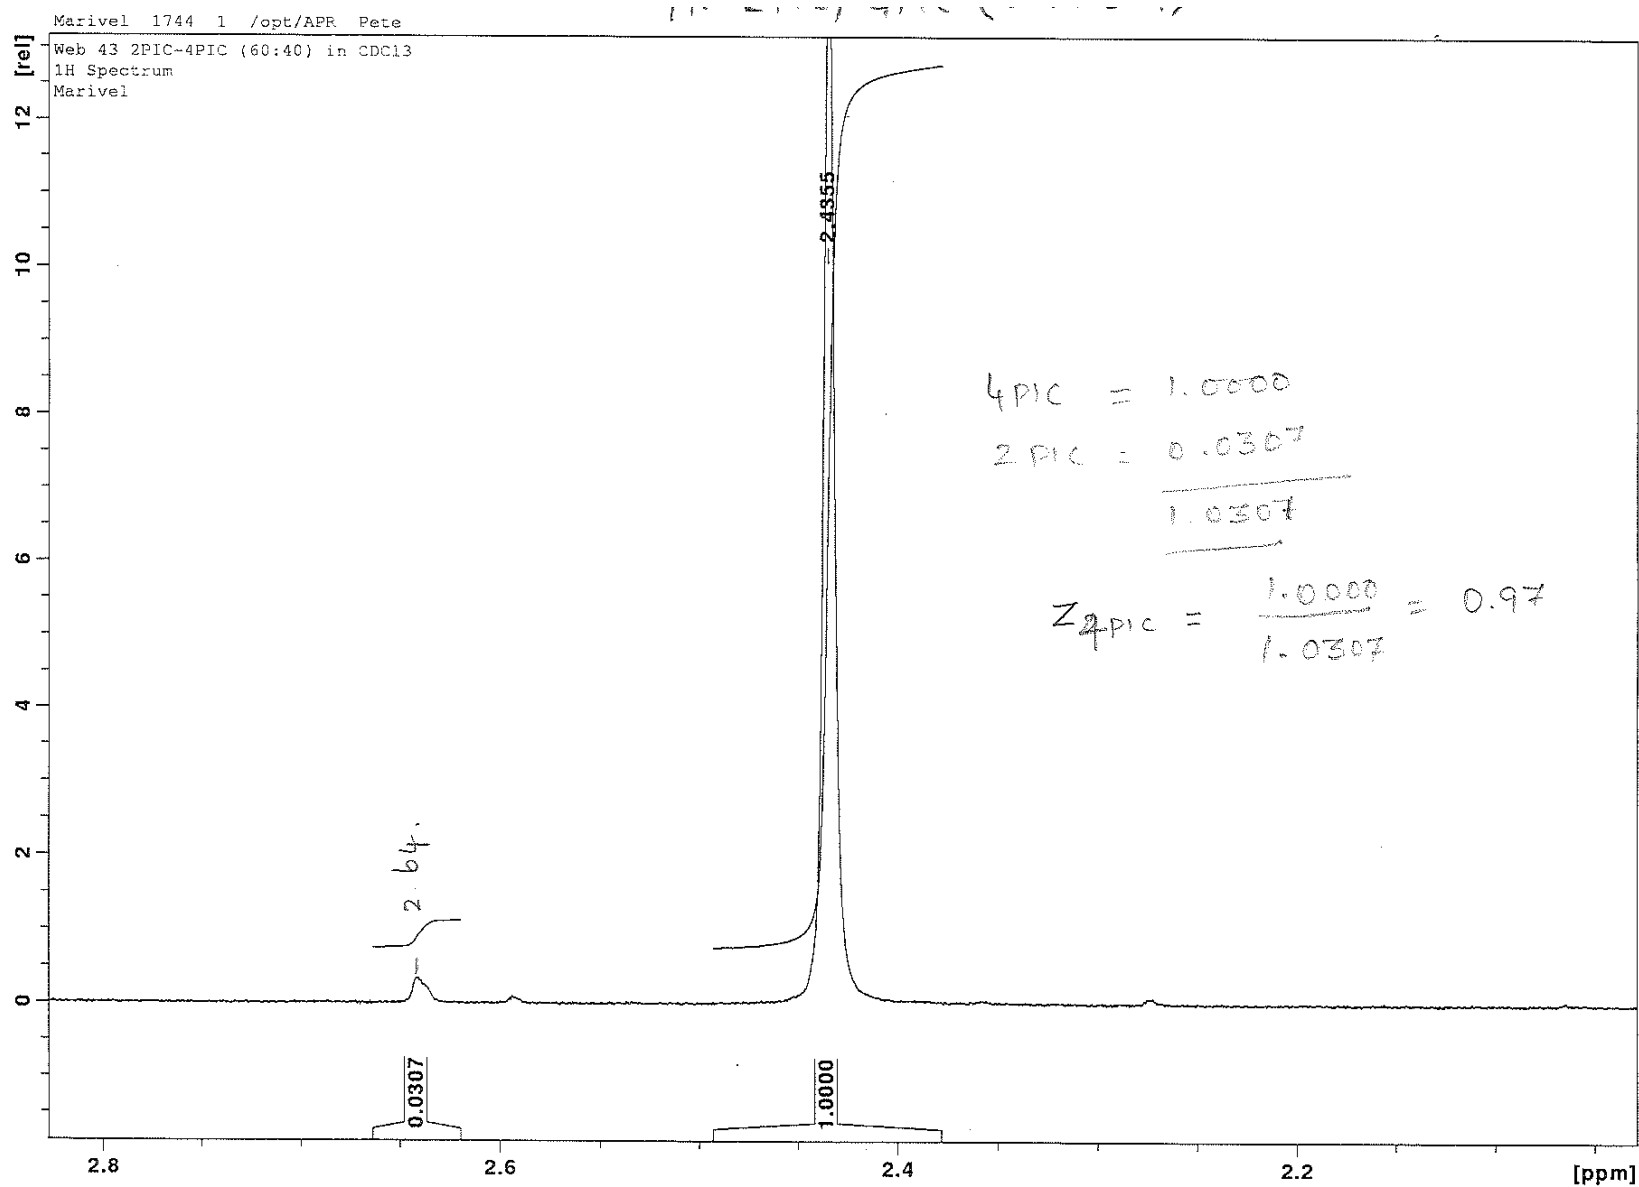

<sup>1</sup>H-NMR (400 MHz) spectrum of H.2PIC/4PIC (0.6:0.4) in CDCl<sub>3</sub> at 25°C

2d. H.2PIC/4PIC (0.7:0.3)

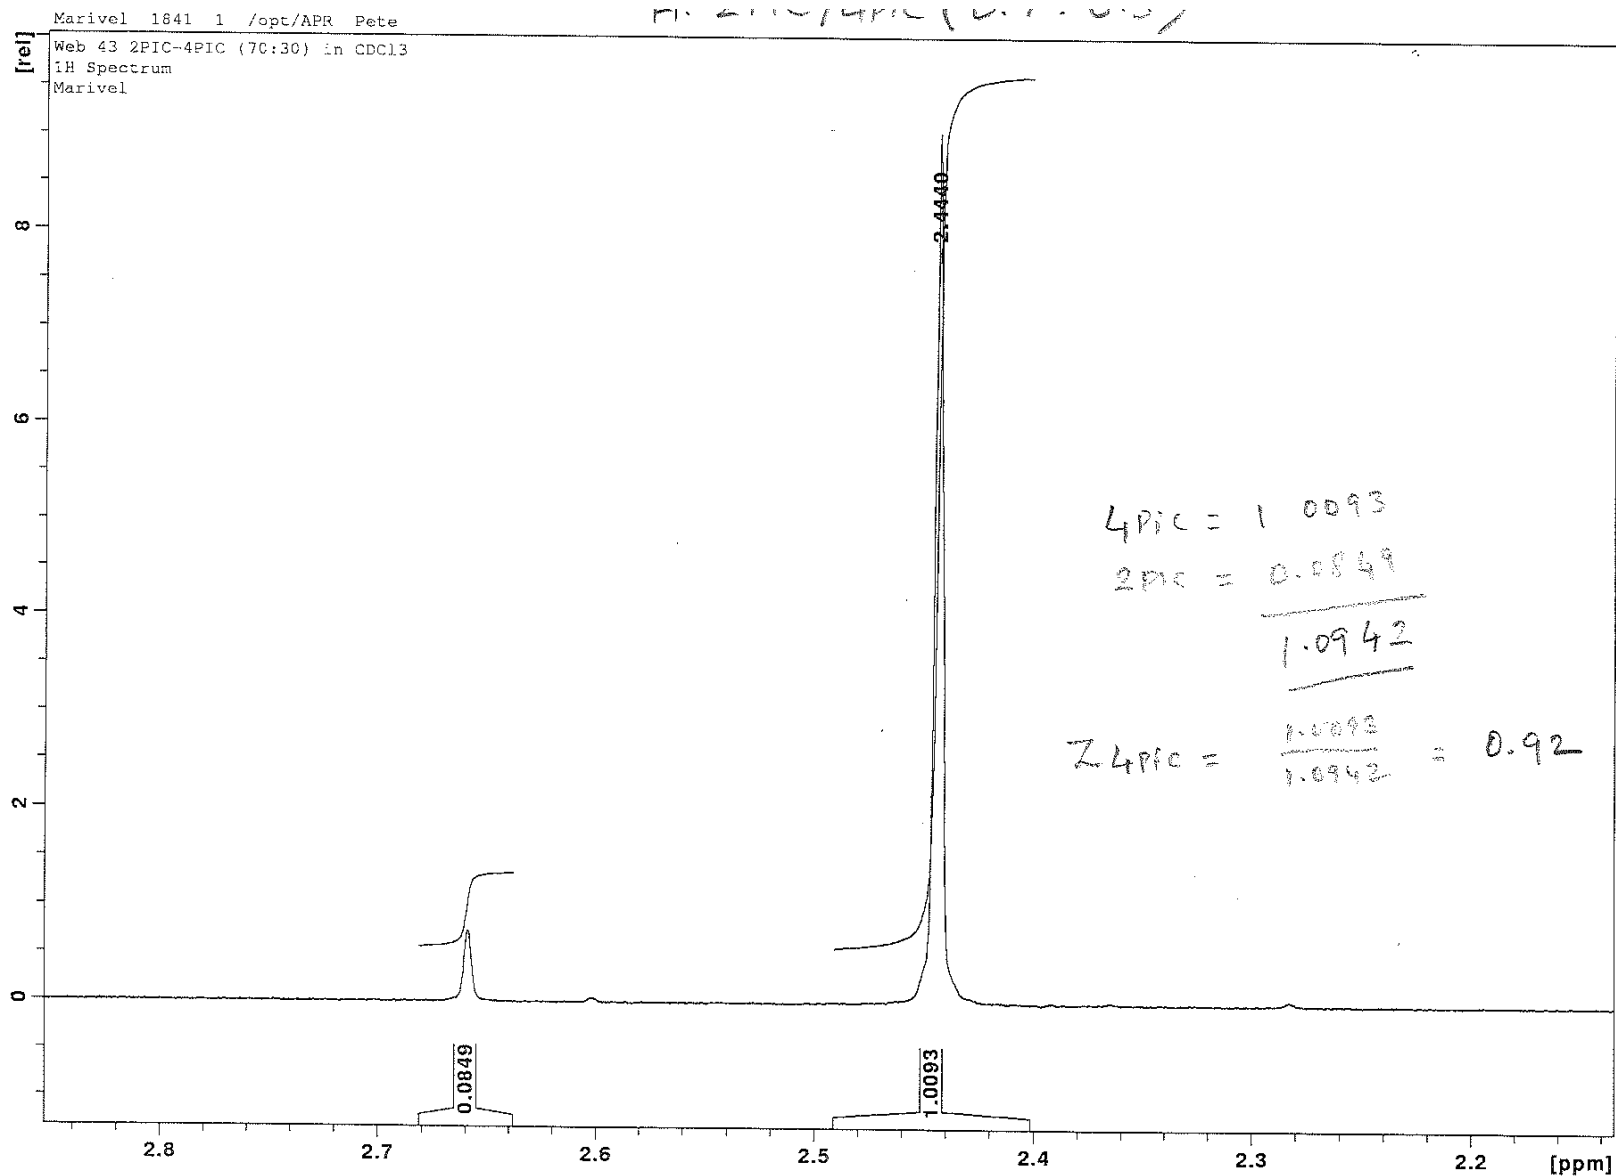

<sup>1</sup>H-NMR (400 MHz) spectrum of H.2PIC/4PIC (0.7:0.3) in CDCl<sub>3</sub> at 25°C

2e. H.2PIC/4PIC (0.8:0.2)

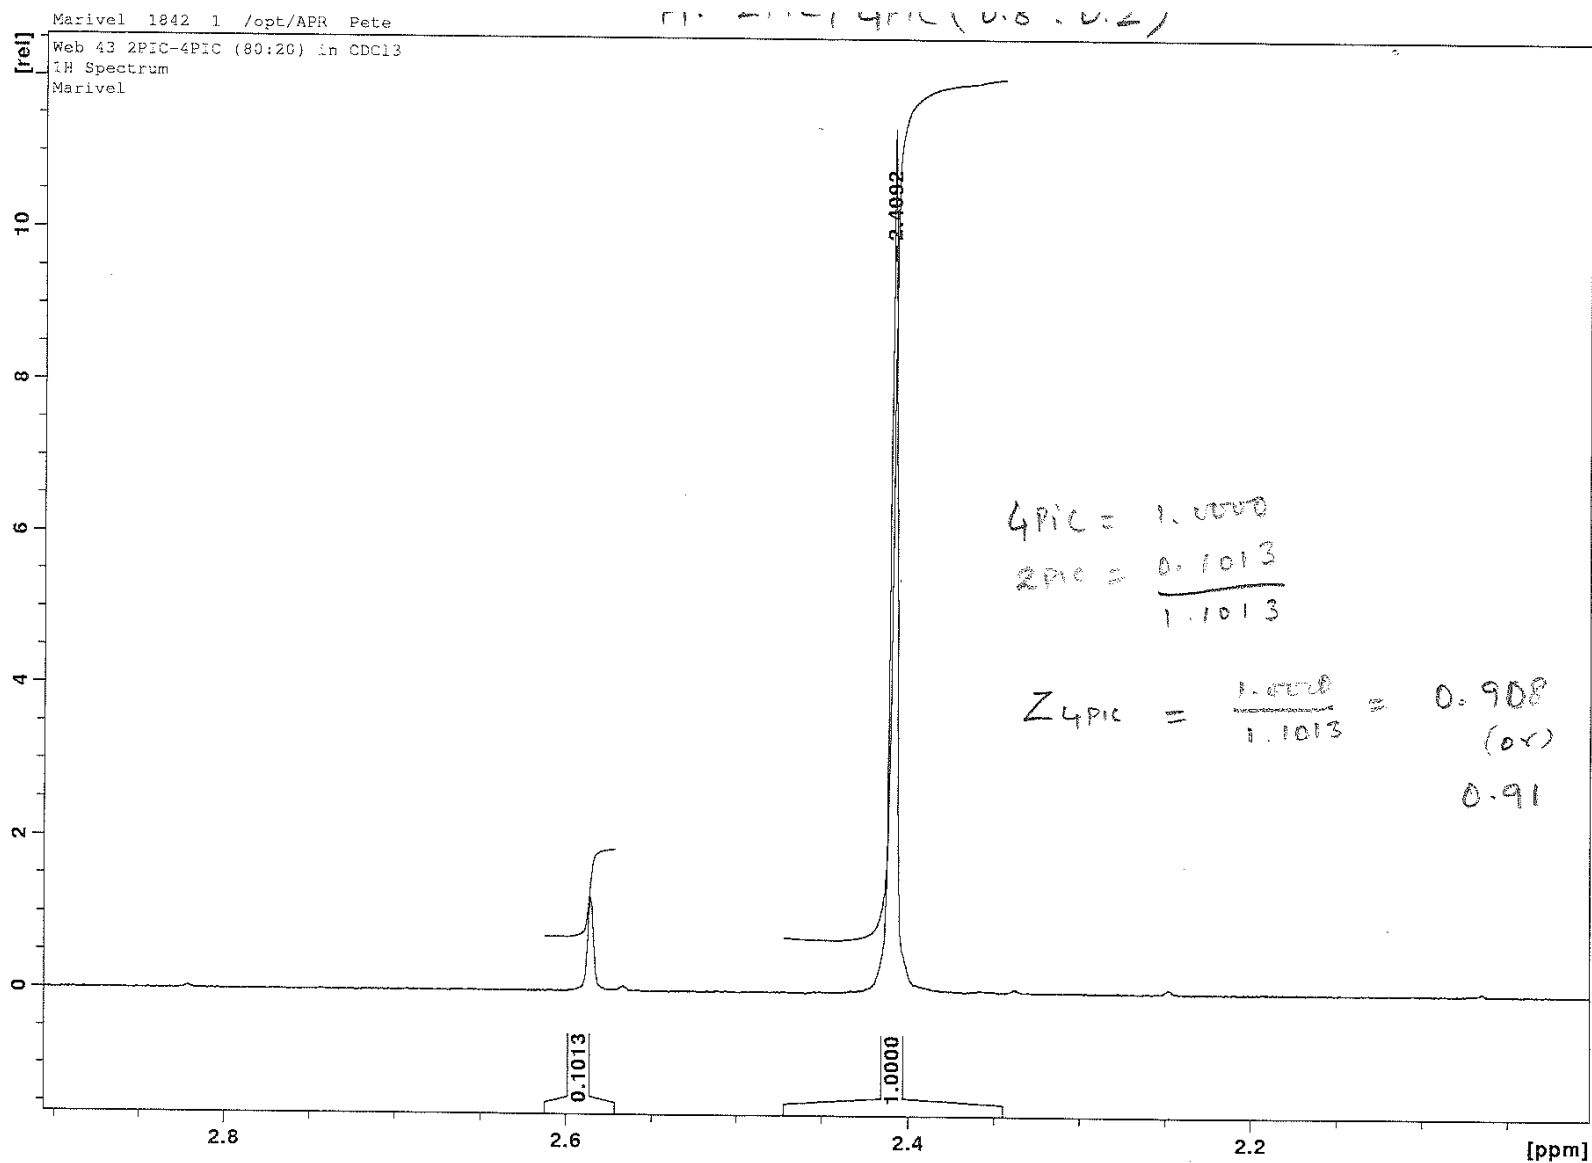

<sup>1</sup>H-NMR (400 MHz) spectrum of H.2PIC/4PIC (0.8:0.2) in CDCl<sub>3</sub> at 25°C

2f. H.2PIC/4PIC (0.85:0.15)

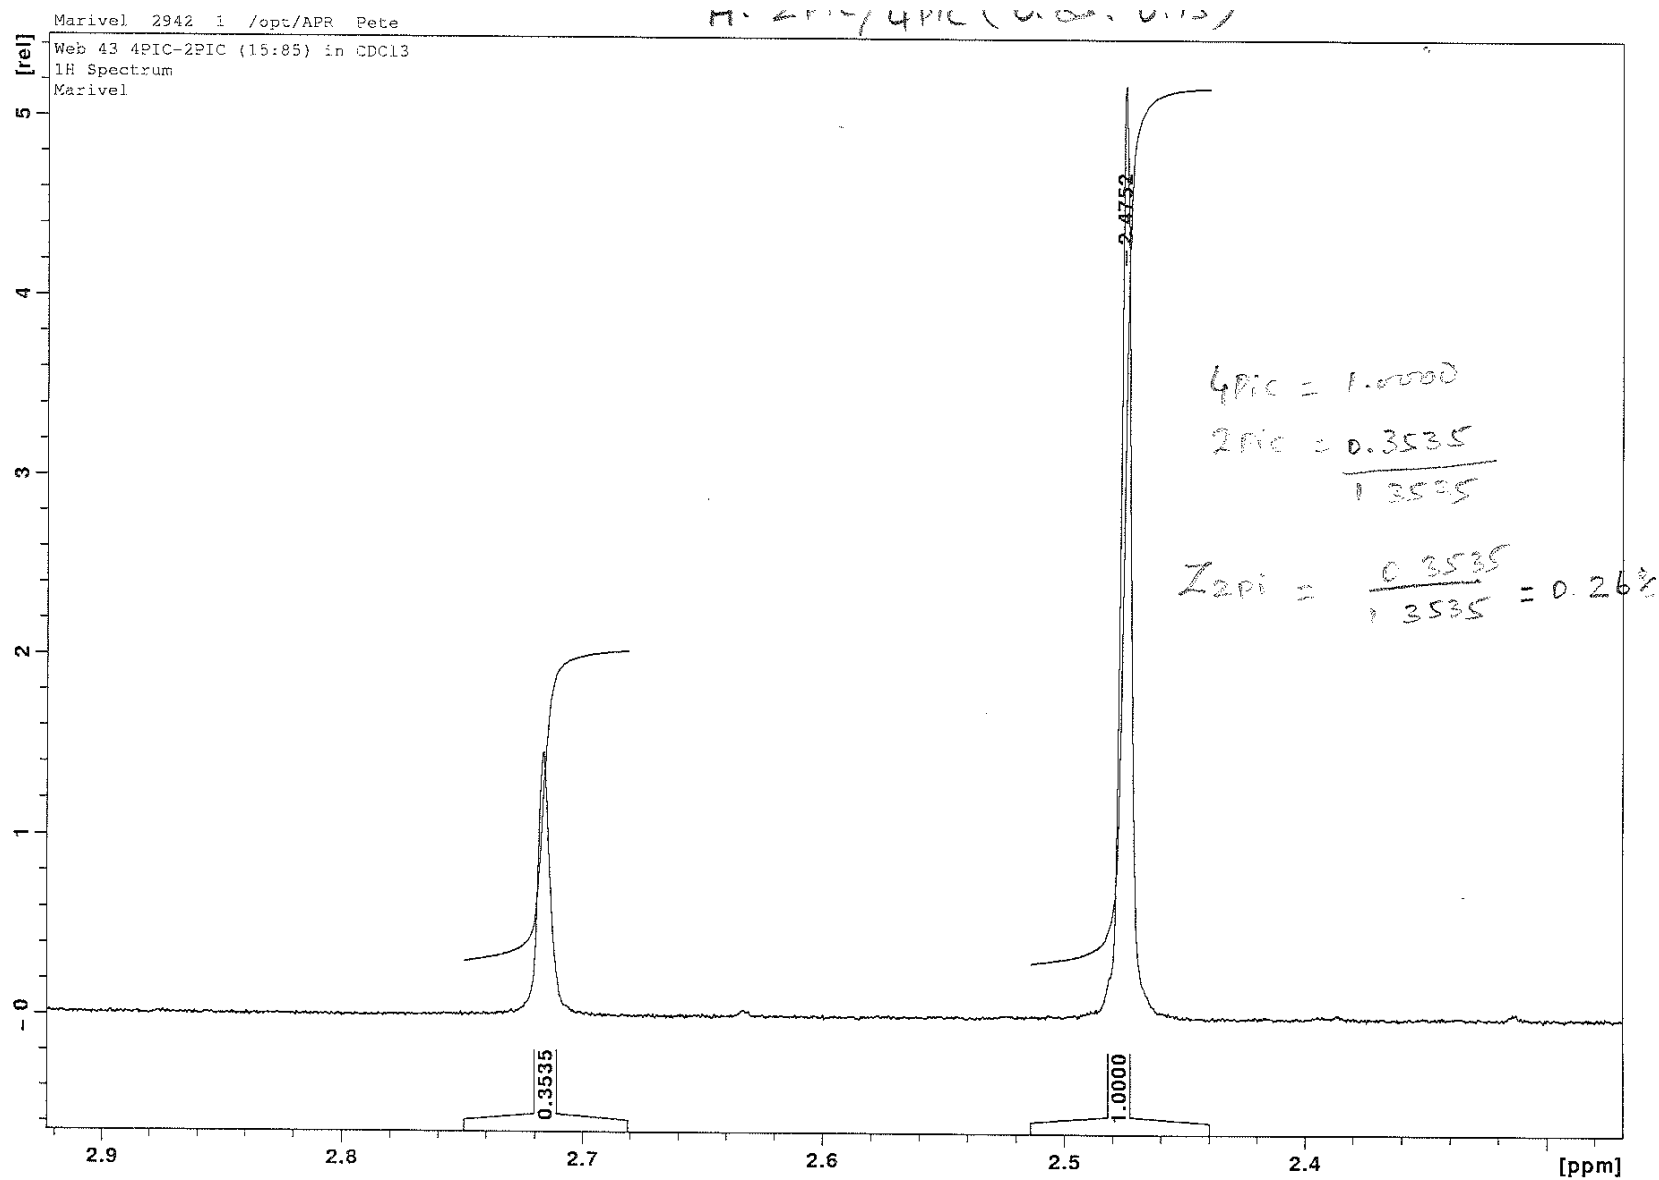

<sup>1</sup>H-NMR (400 MHz) spectrum of H.2PIC/4PIC (0.85:0.15) in CDCl<sub>3</sub> at 25°C



2g. H.2PIC/4PIC (0.9:0.1)

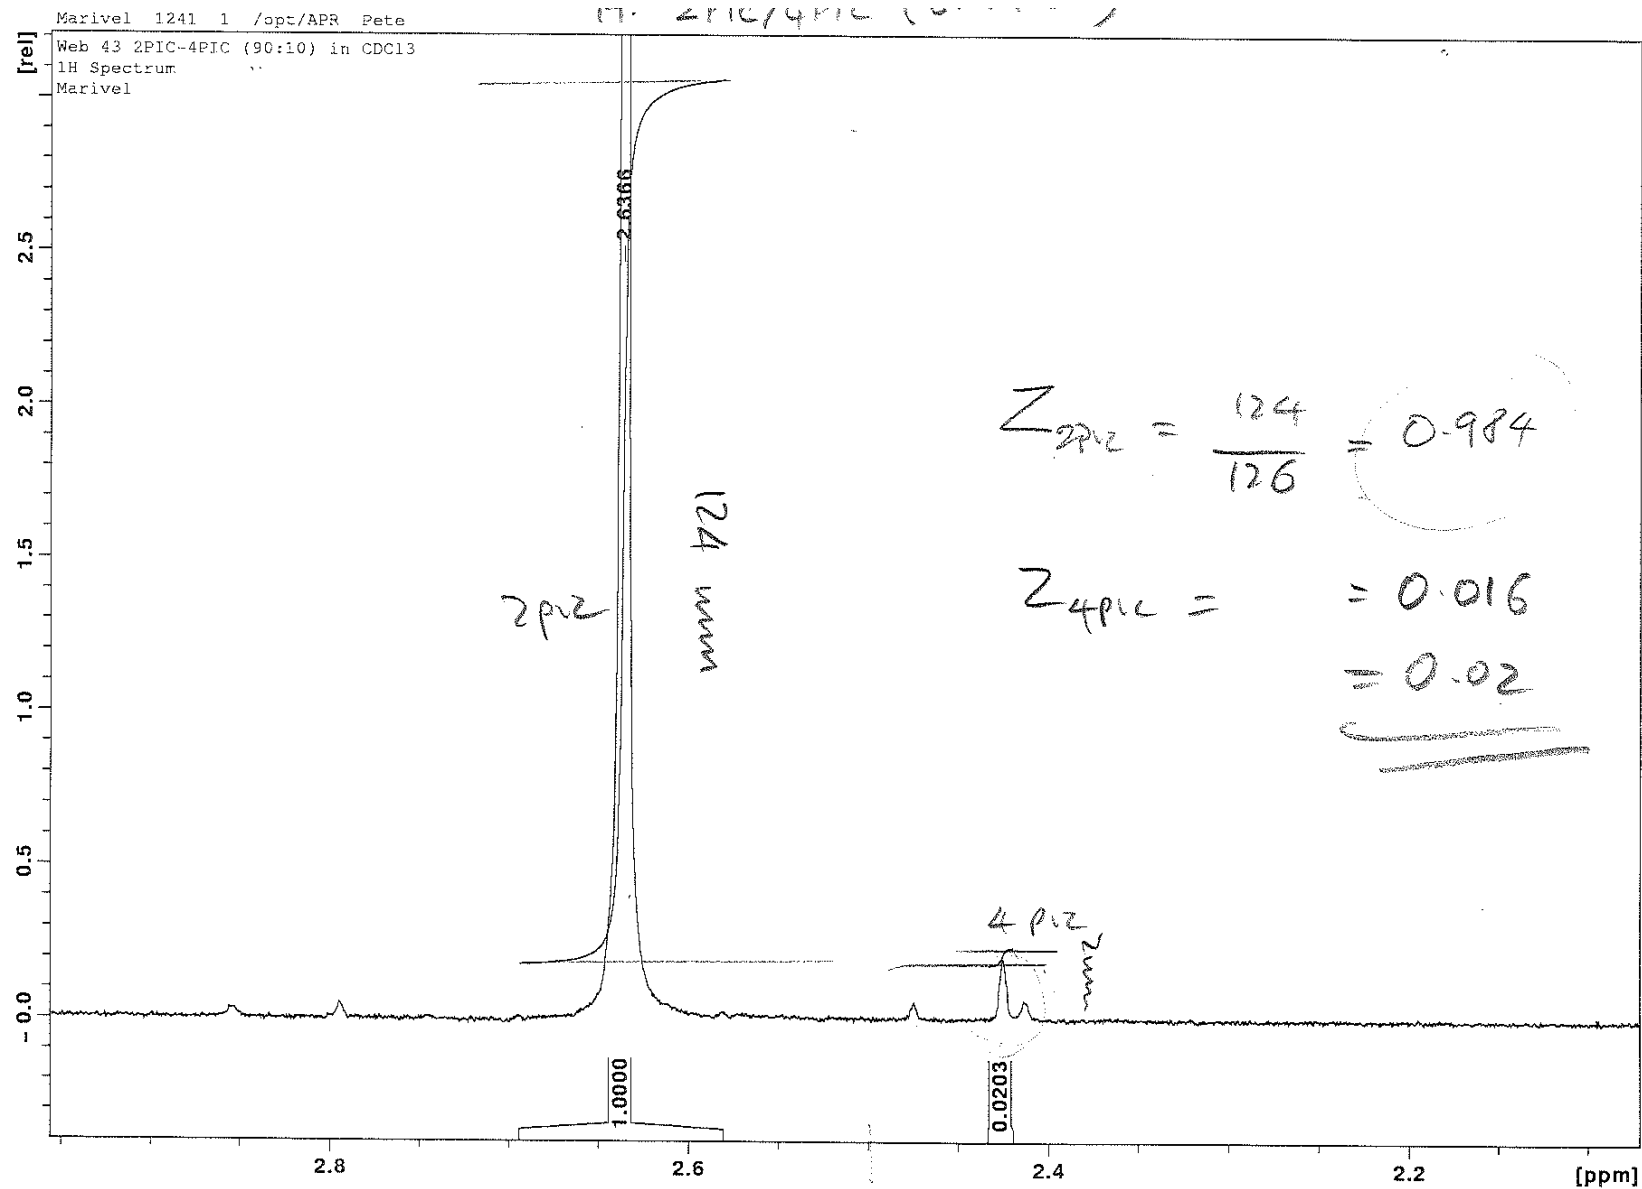

<sup>1</sup>H-NMR (400 MHz) spectrum of H.2PIC/4PIC (0.9:0.1) in CDCl<sub>3</sub> at 25°C

**3a. H.3PIC/4PIC (0.9:0.1)**

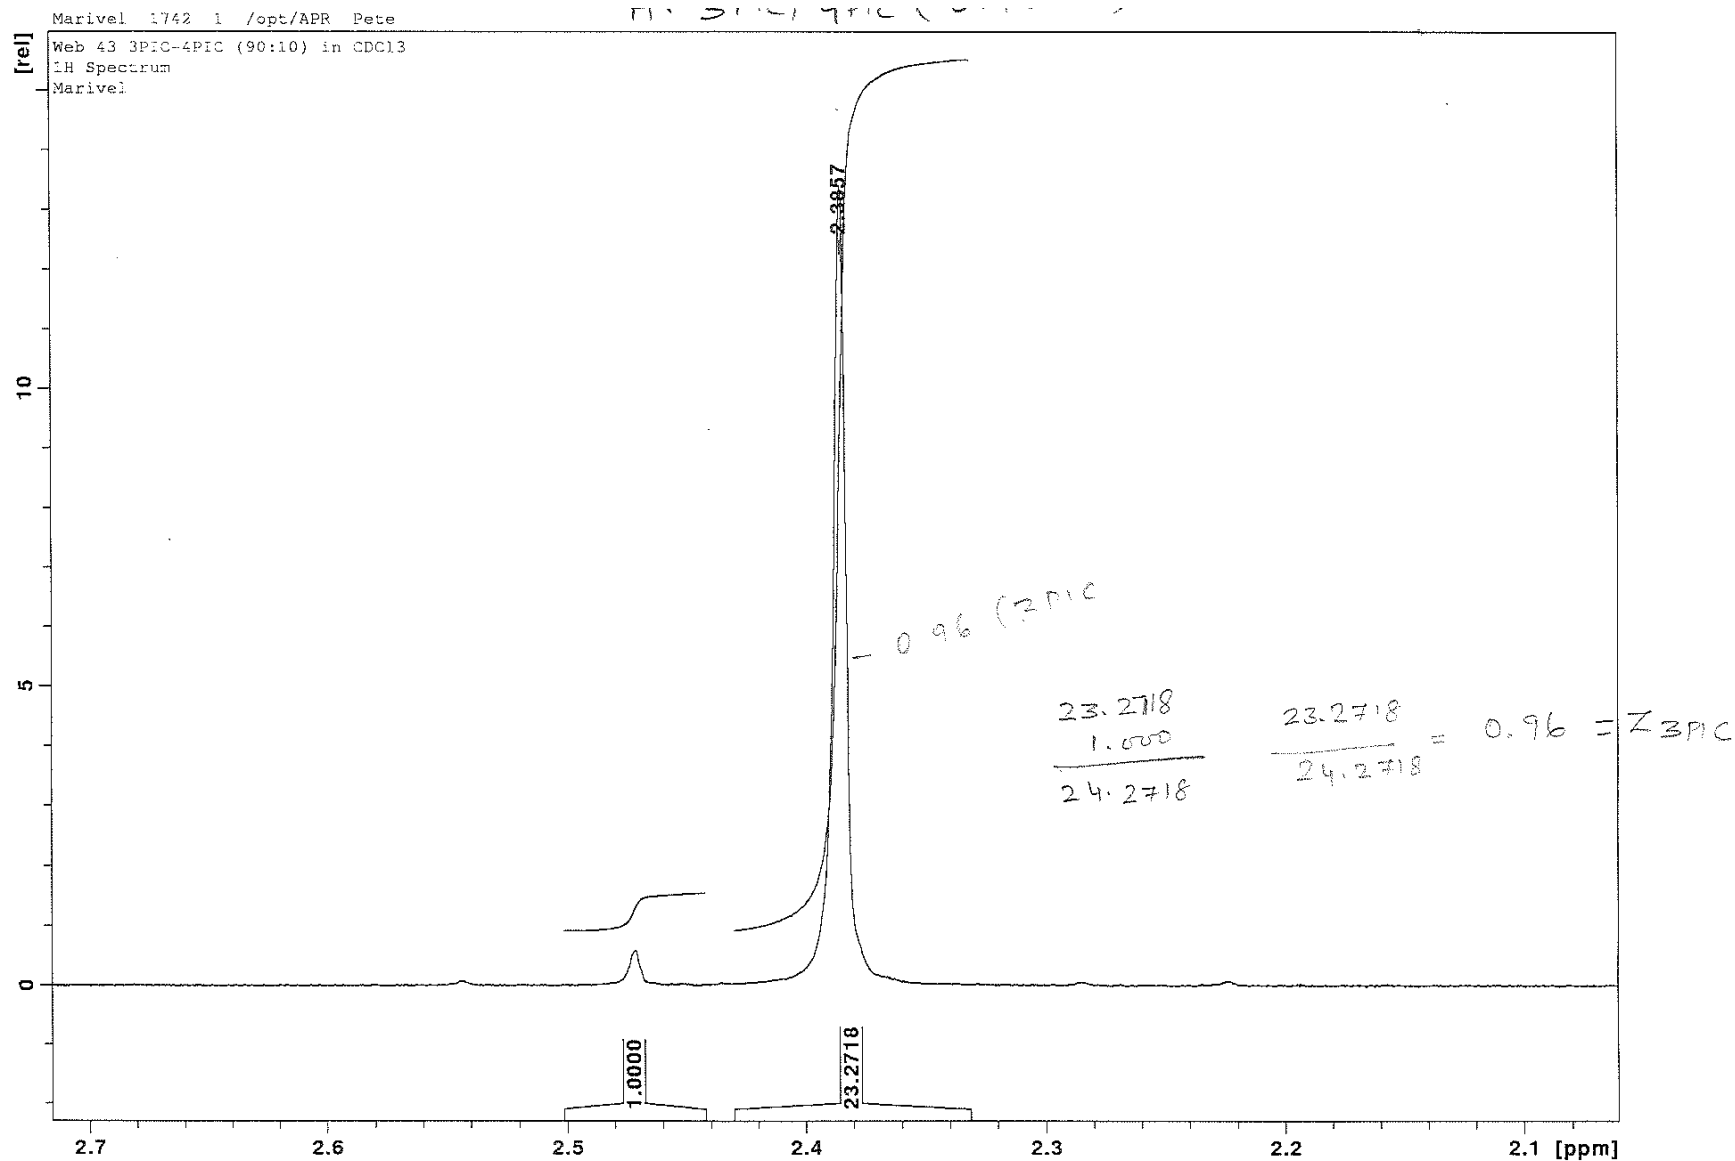

<sup>1</sup>H-NMR (400 MHz) spectrum of **H.3PIC/4PIC (0.9:0.1)** in CDCl<sub>3</sub> at 25°C

**3b. H.3PIC/4PIC (0.8:0.2)**

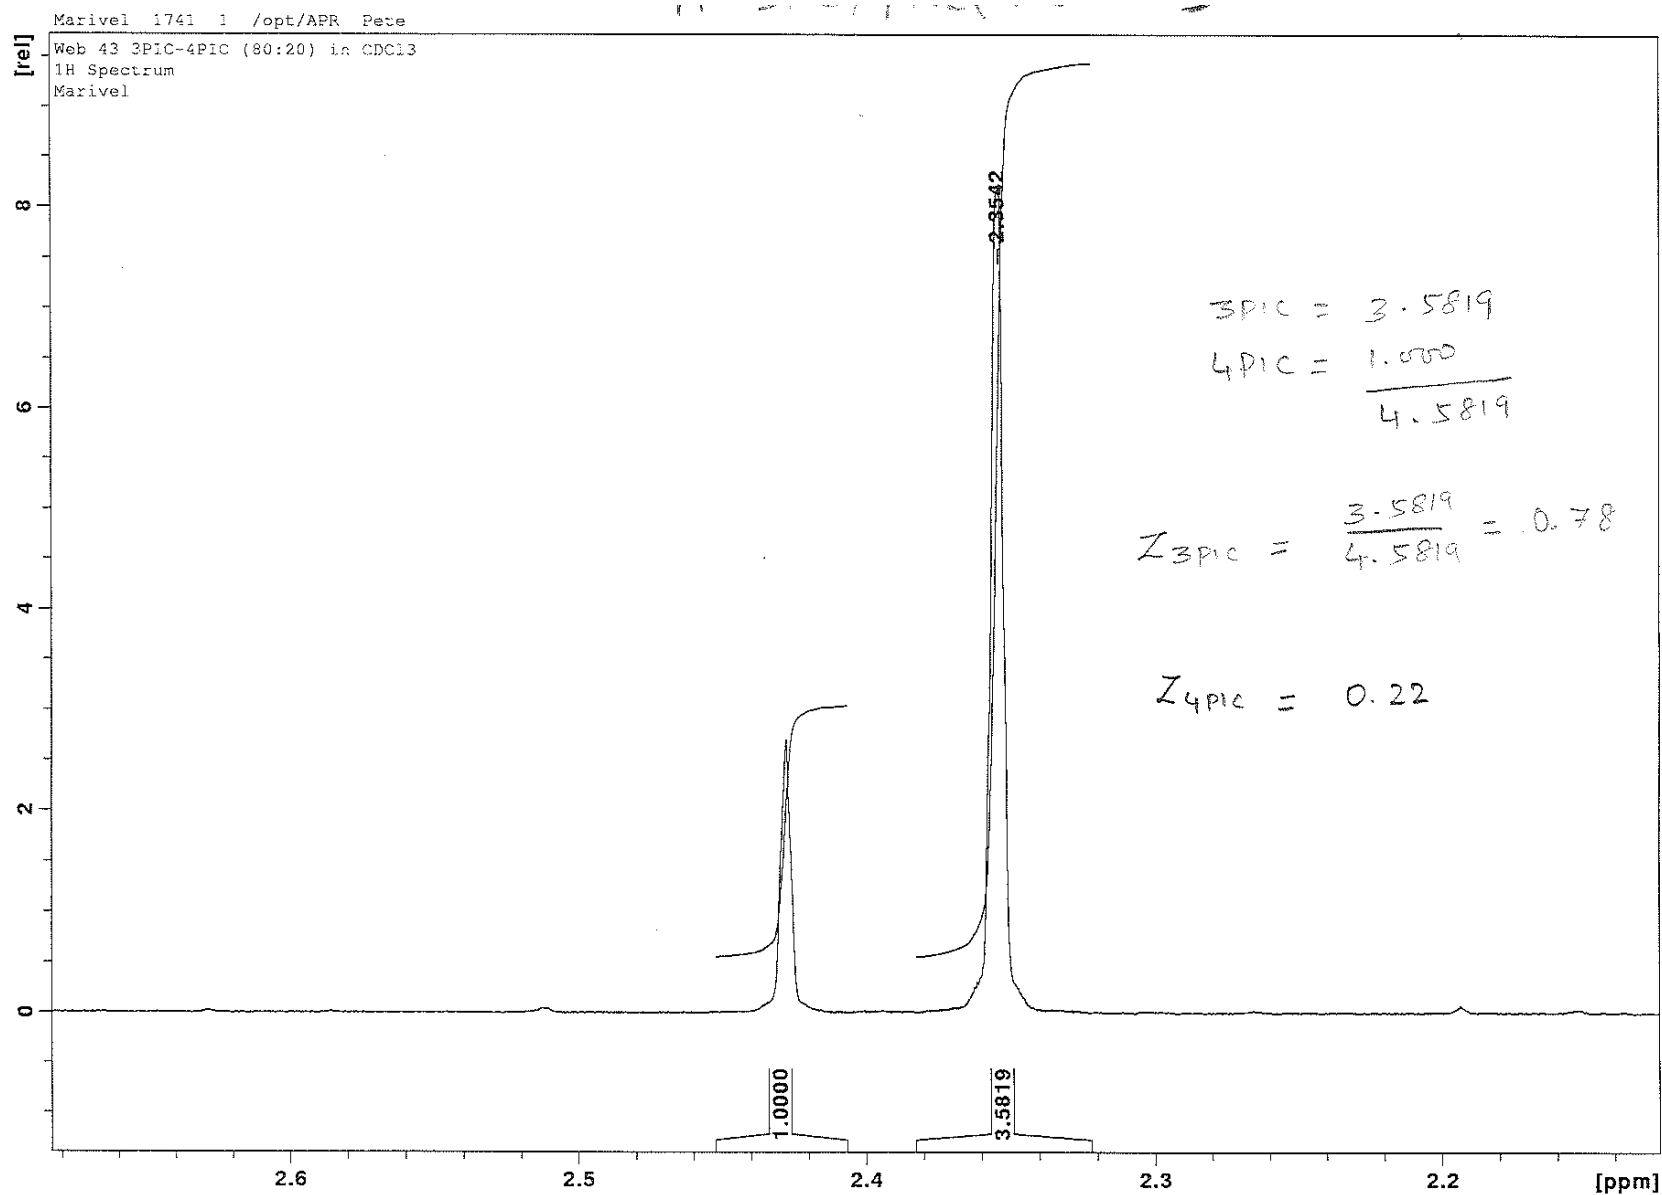

<sup>1</sup>H-NMR (400 MHz) spectrum of **H.3PIC/4PIC (0.8:0.2)** in CDCl<sub>3</sub> at 25°C

**3c. H.3PIC/4PIC (0.7:0.3)**

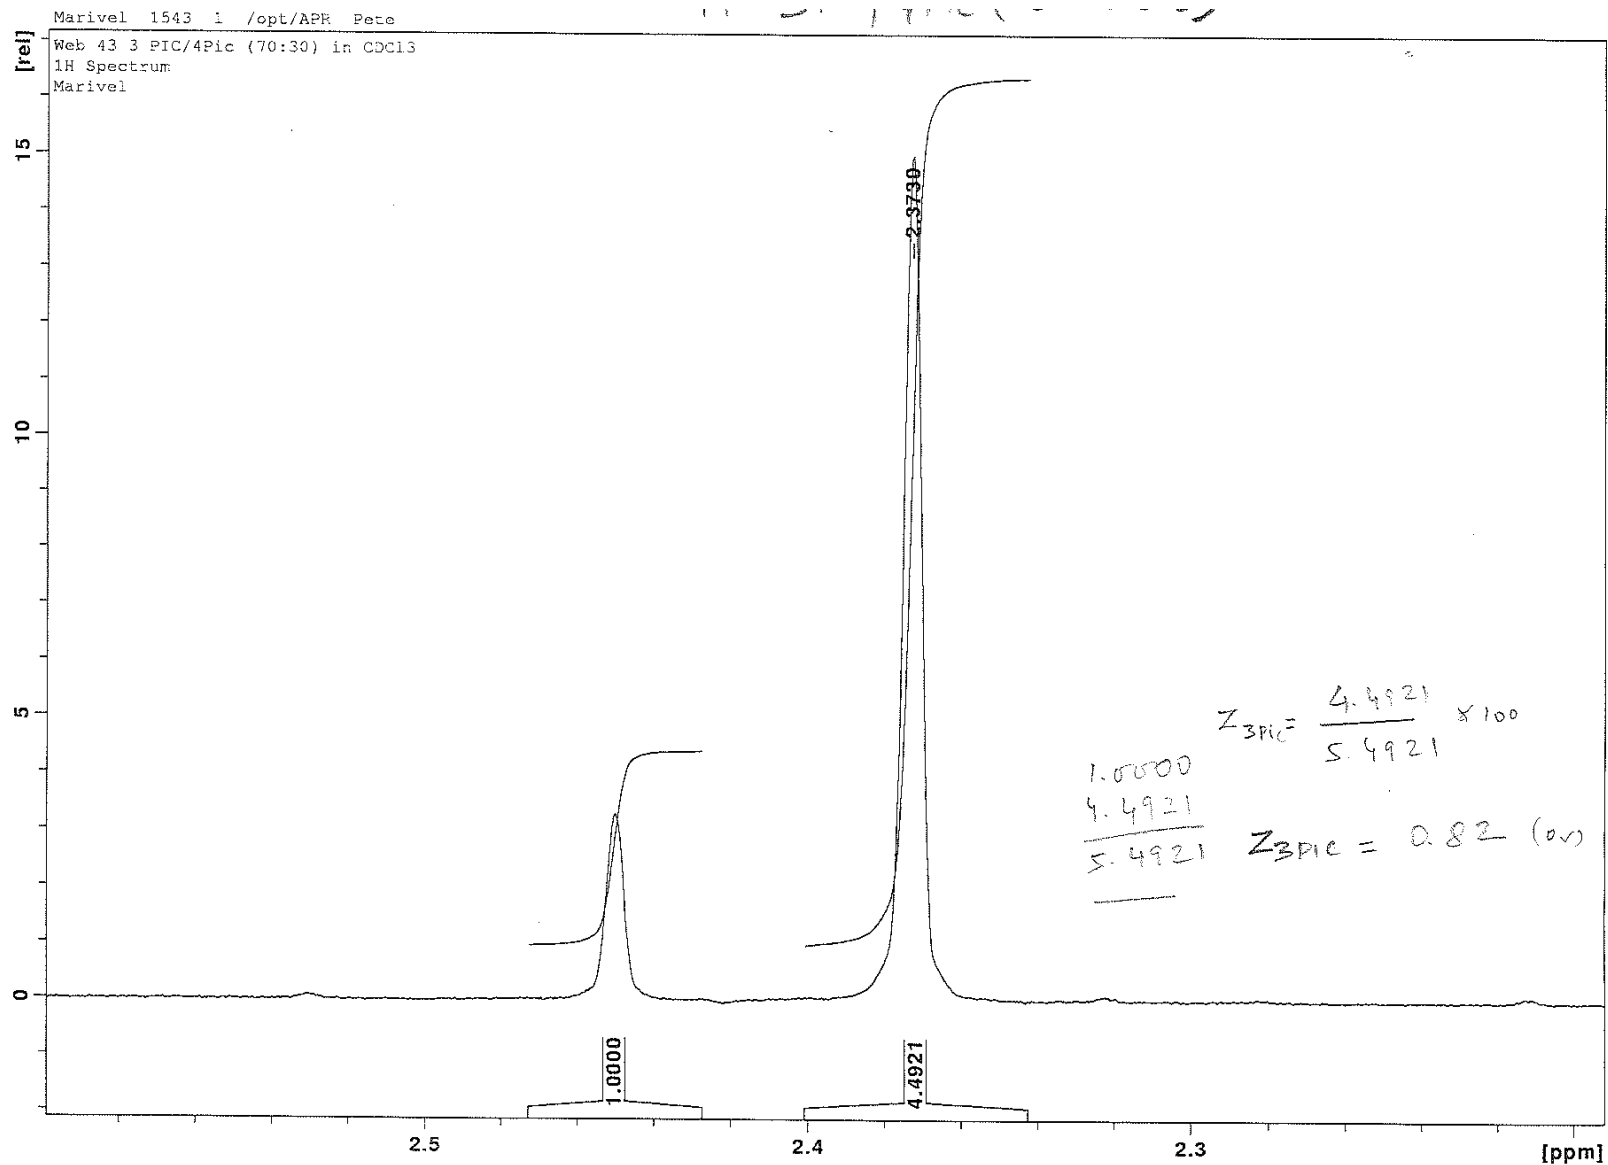

<sup>1</sup>H-NMR (400 MHz) spectrum of **H.3PIC/4PIC (0.7:0.3)** in CDCl<sub>3</sub> at 25°C

3d. H.3PIC/4PIC (0.6:0.4) contains mixture of H.3PIC (VI) and H.4PIC (VII)

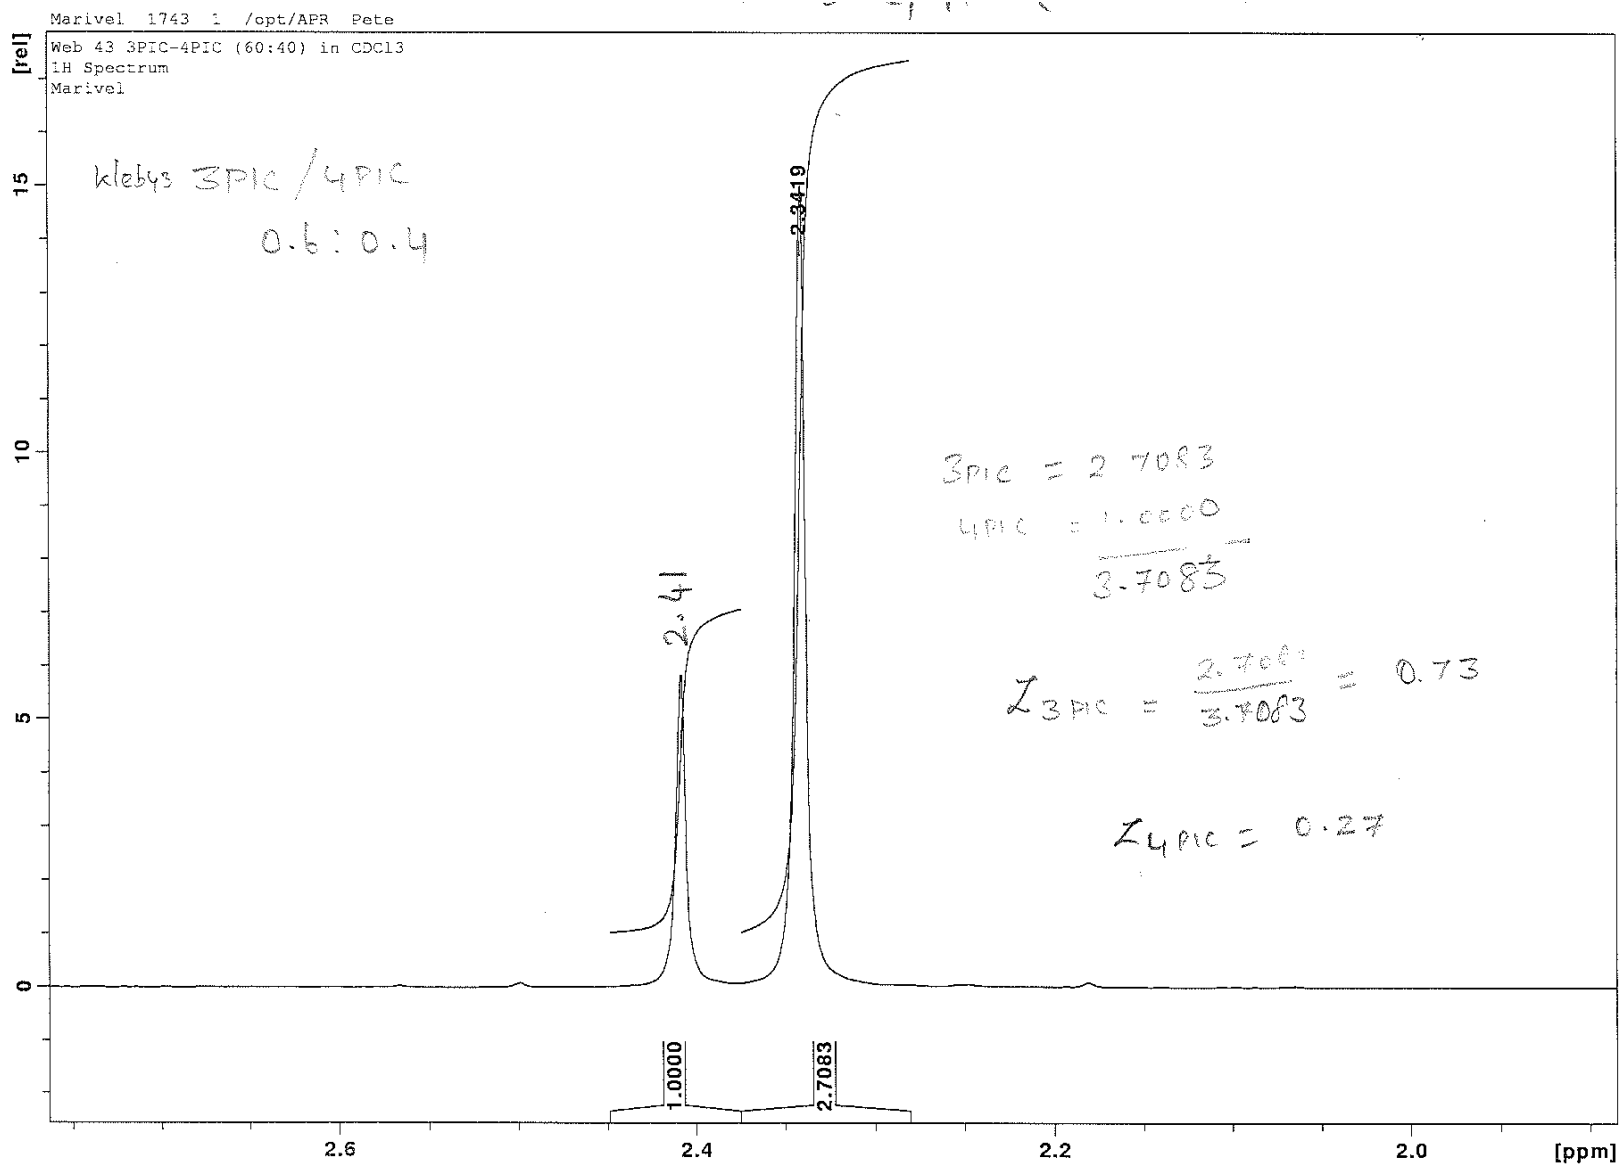

<sup>1</sup>H-NMR (400 MHz) spectrum of H.3PIC/4PIC (0.6:0.4) in CDCl<sub>3</sub> at 25°C

**3e. H.3PIC/4PIC (0.55:0.45)**

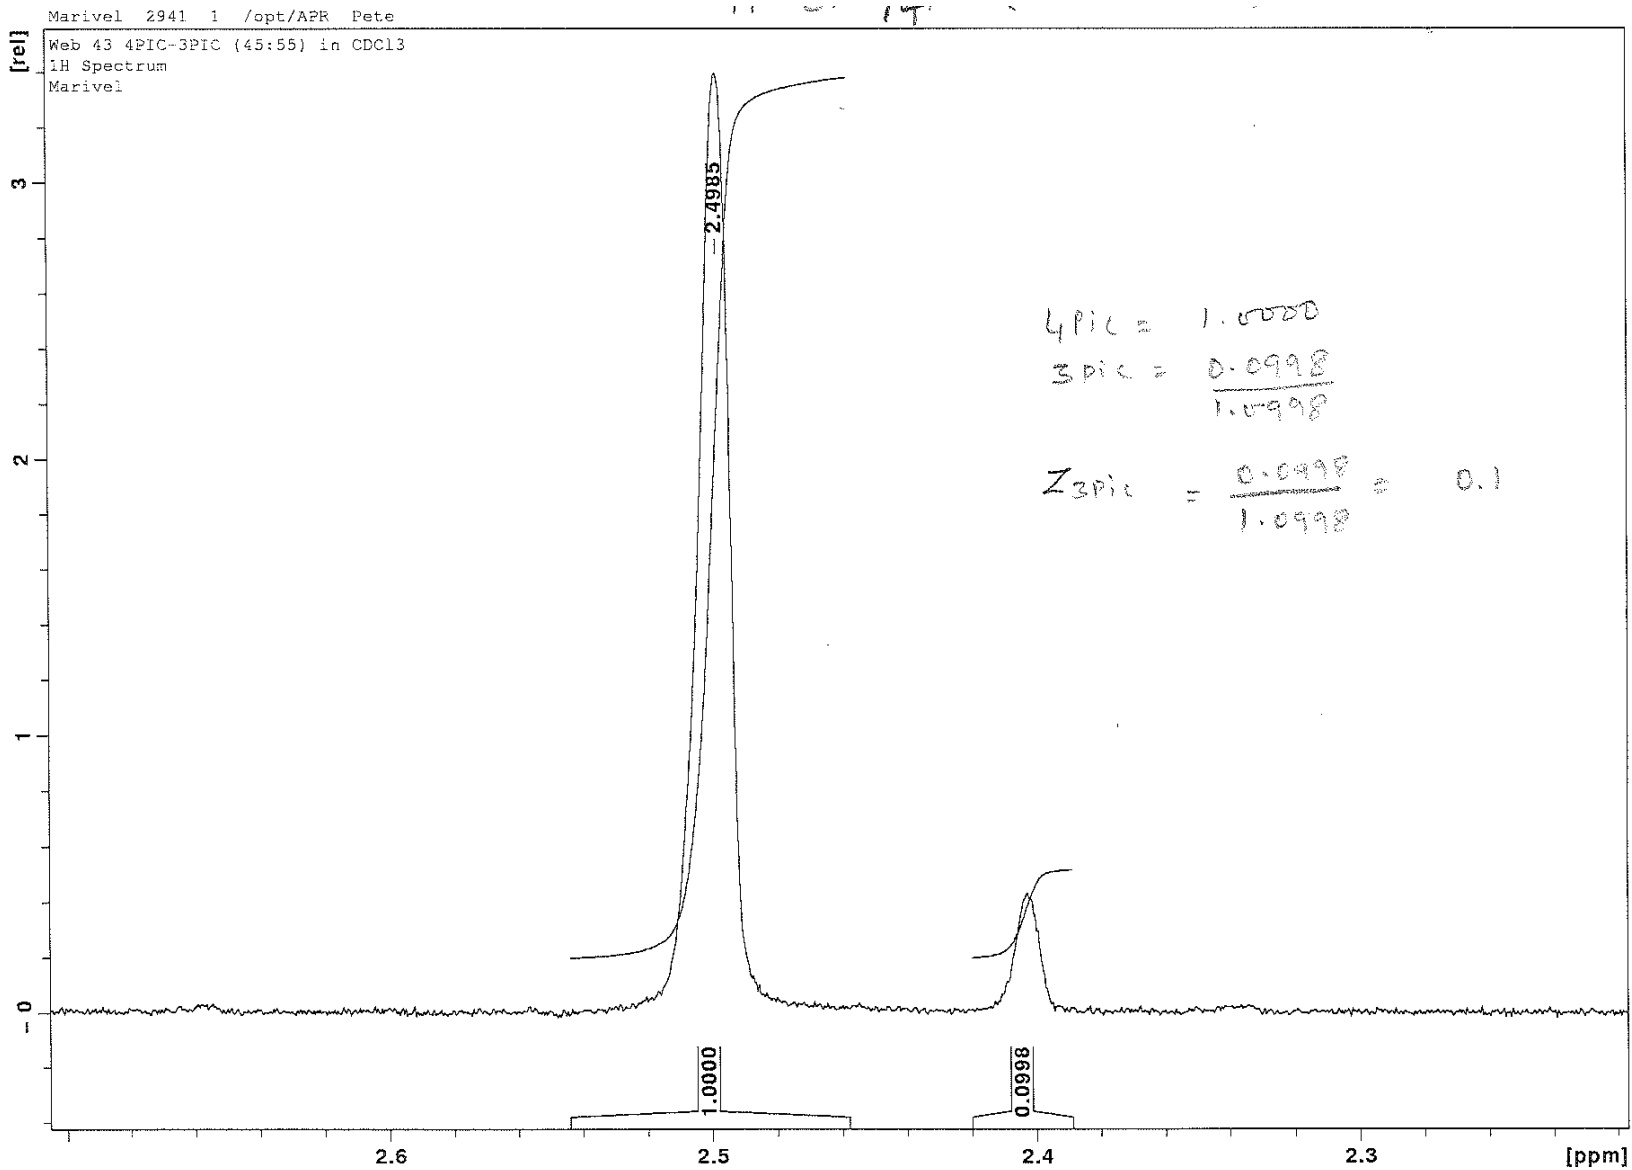

<sup>1</sup>H-NMR (400 MHz) spectrum of **H.3PIC/4PIC (0.55:0.45)** in CDCl<sub>3</sub> at 25°C

3f. H.3PIC/4PIC (0.5:0.4)

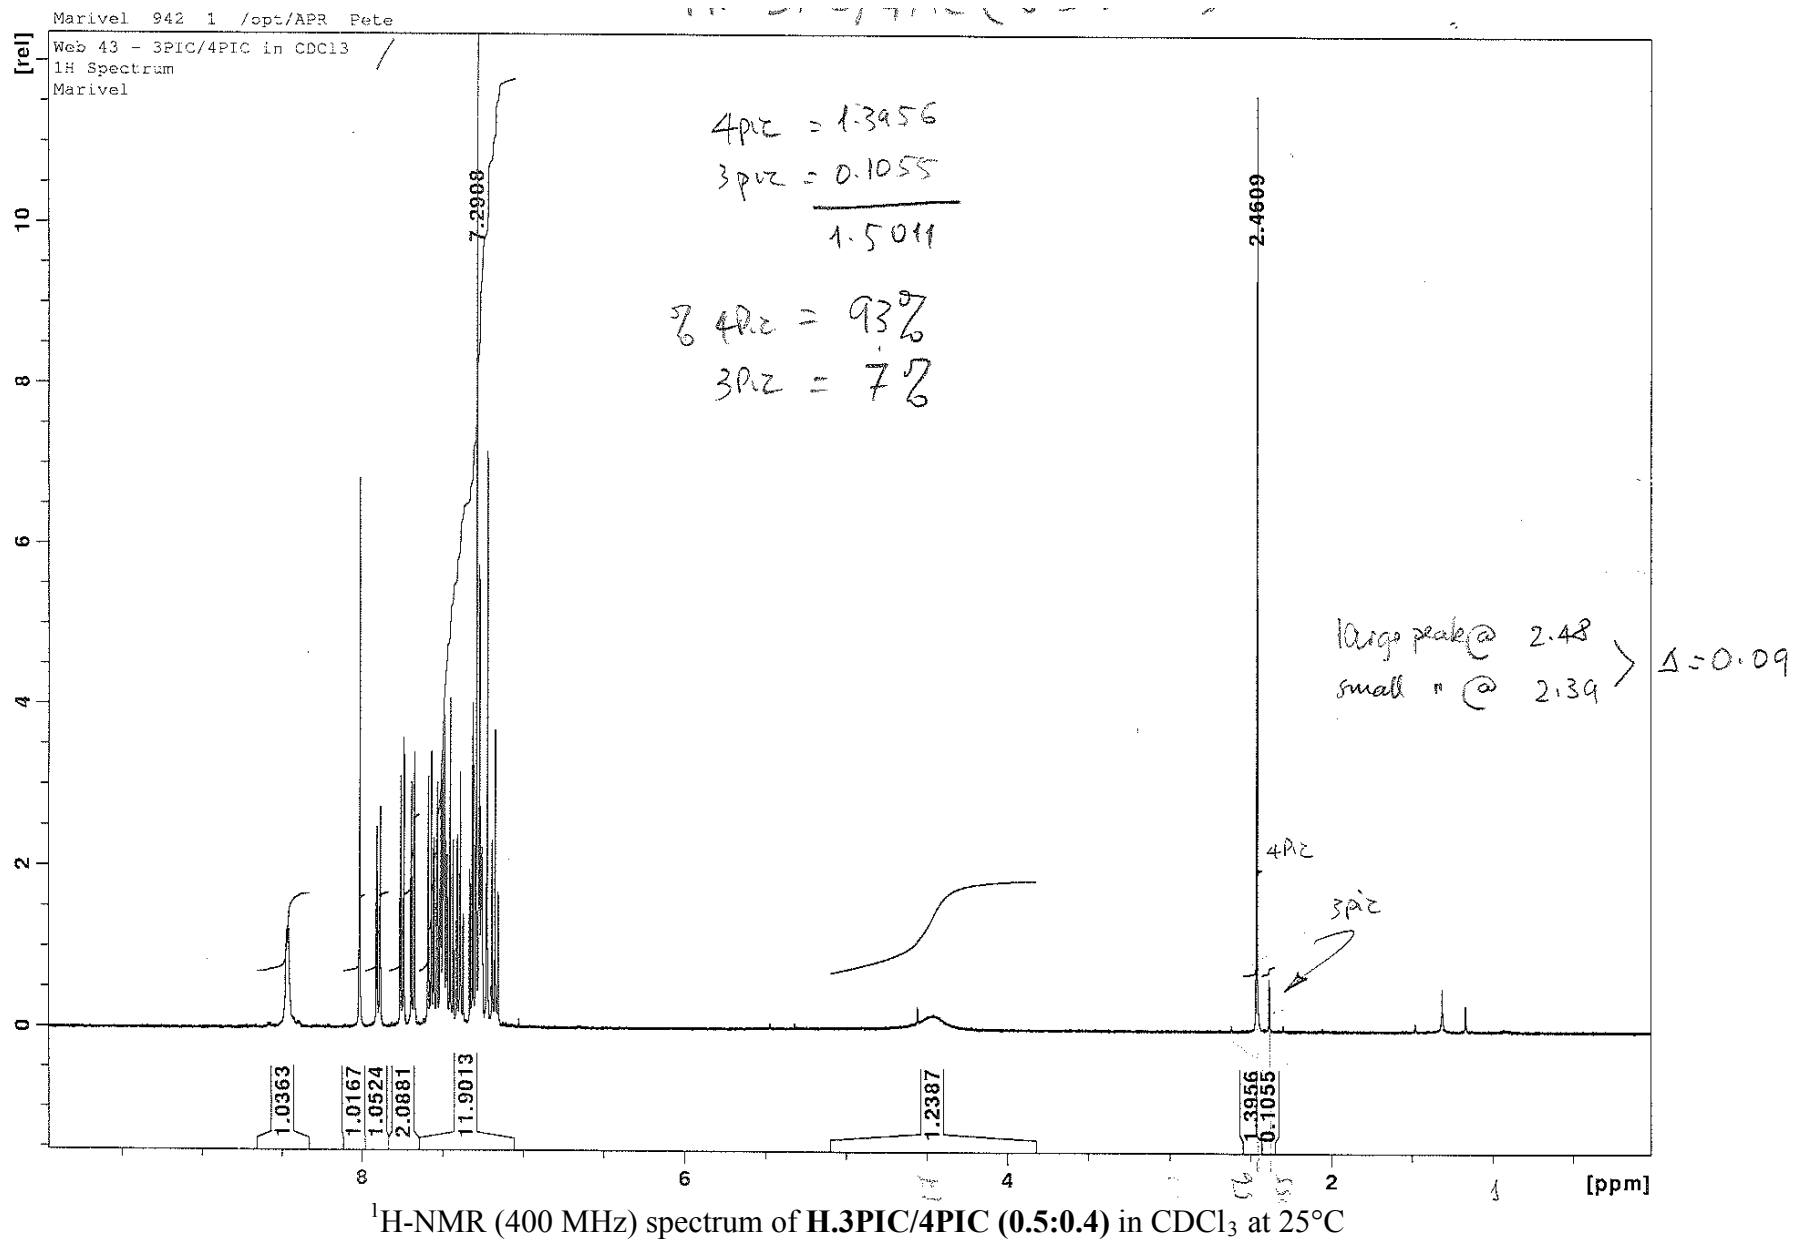

4a. H.2PIC/3PIC/4PIC (0.6:0.2:0.2) - 'A'

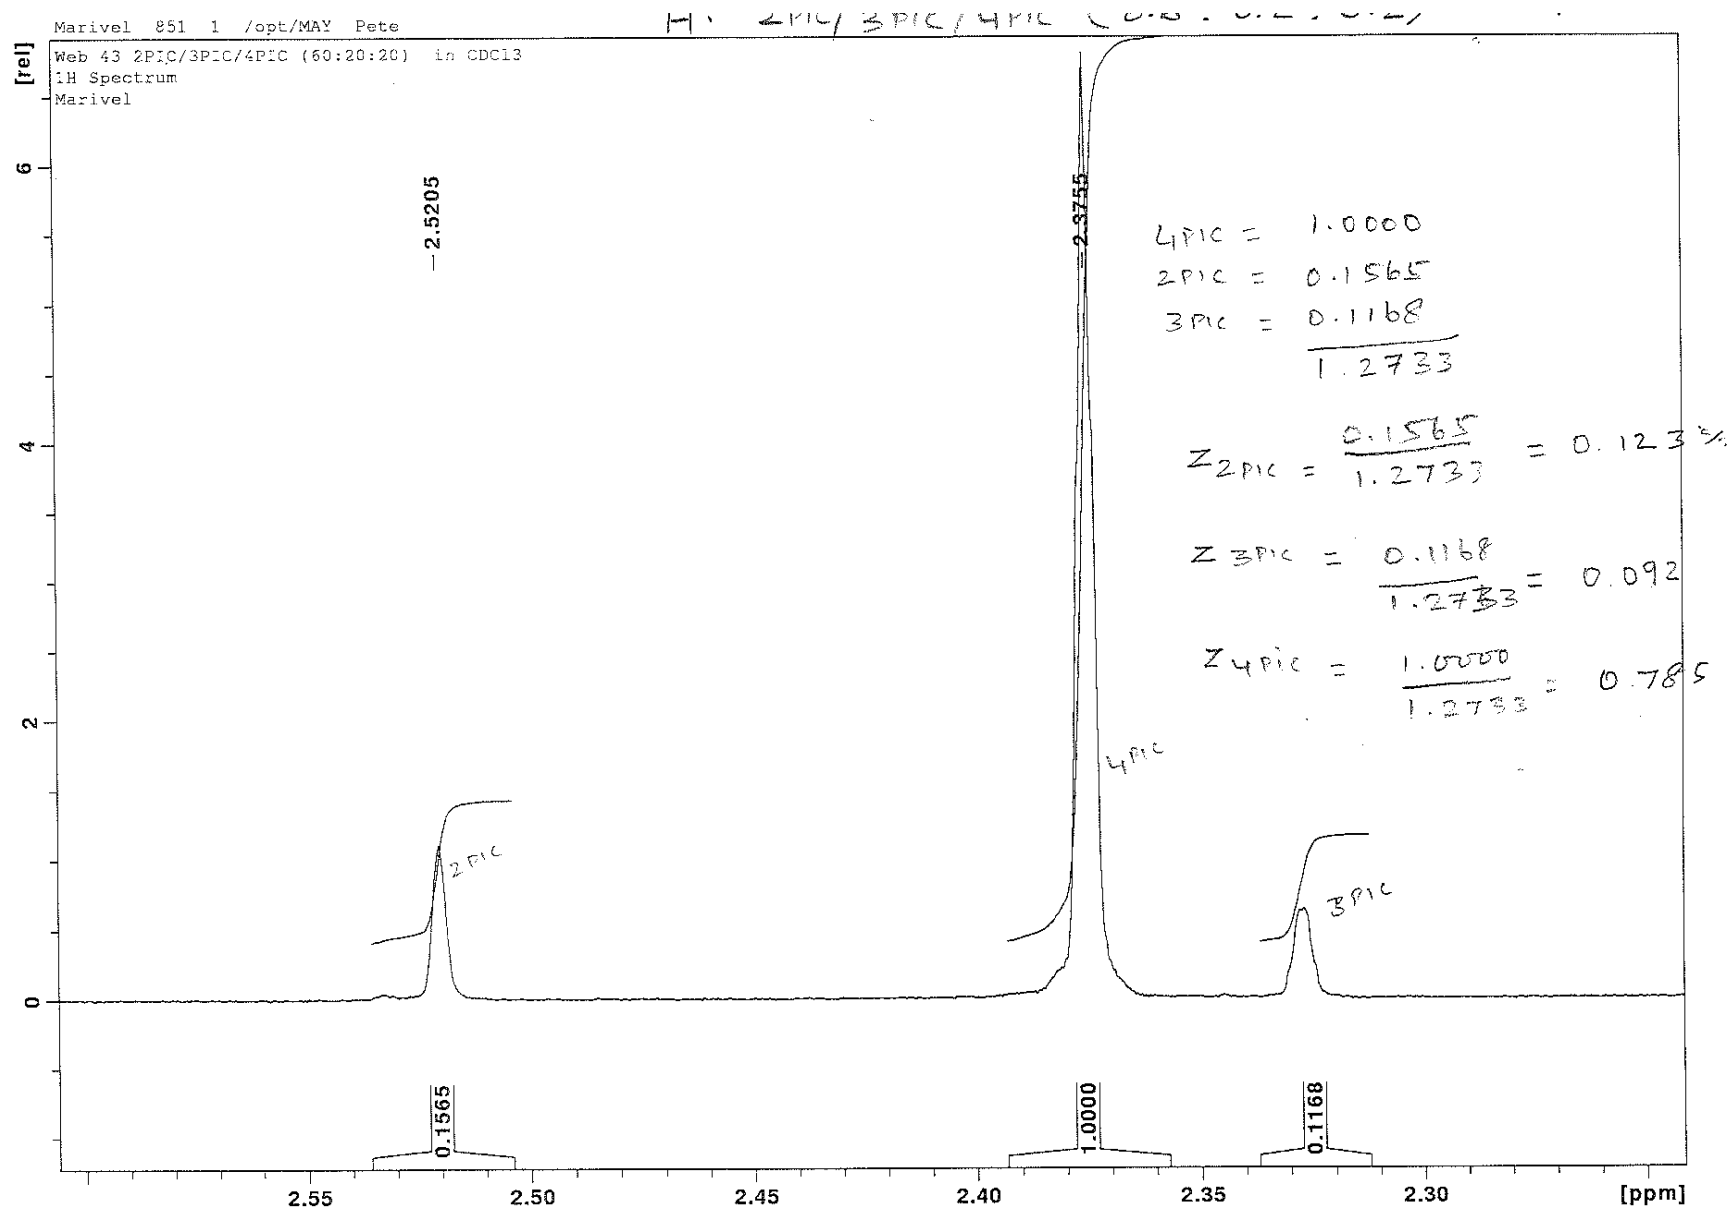

<sup>1</sup>H-NMR (400 MHz) spectrum of H.2PIC/3PIC/4PIC (0.6:0.2:0.2) in CDCl<sub>3</sub> at 25°C



4b. H.2PIC/3PIC/4PIC (0.4:0.4:0.2) – 'B' - IX

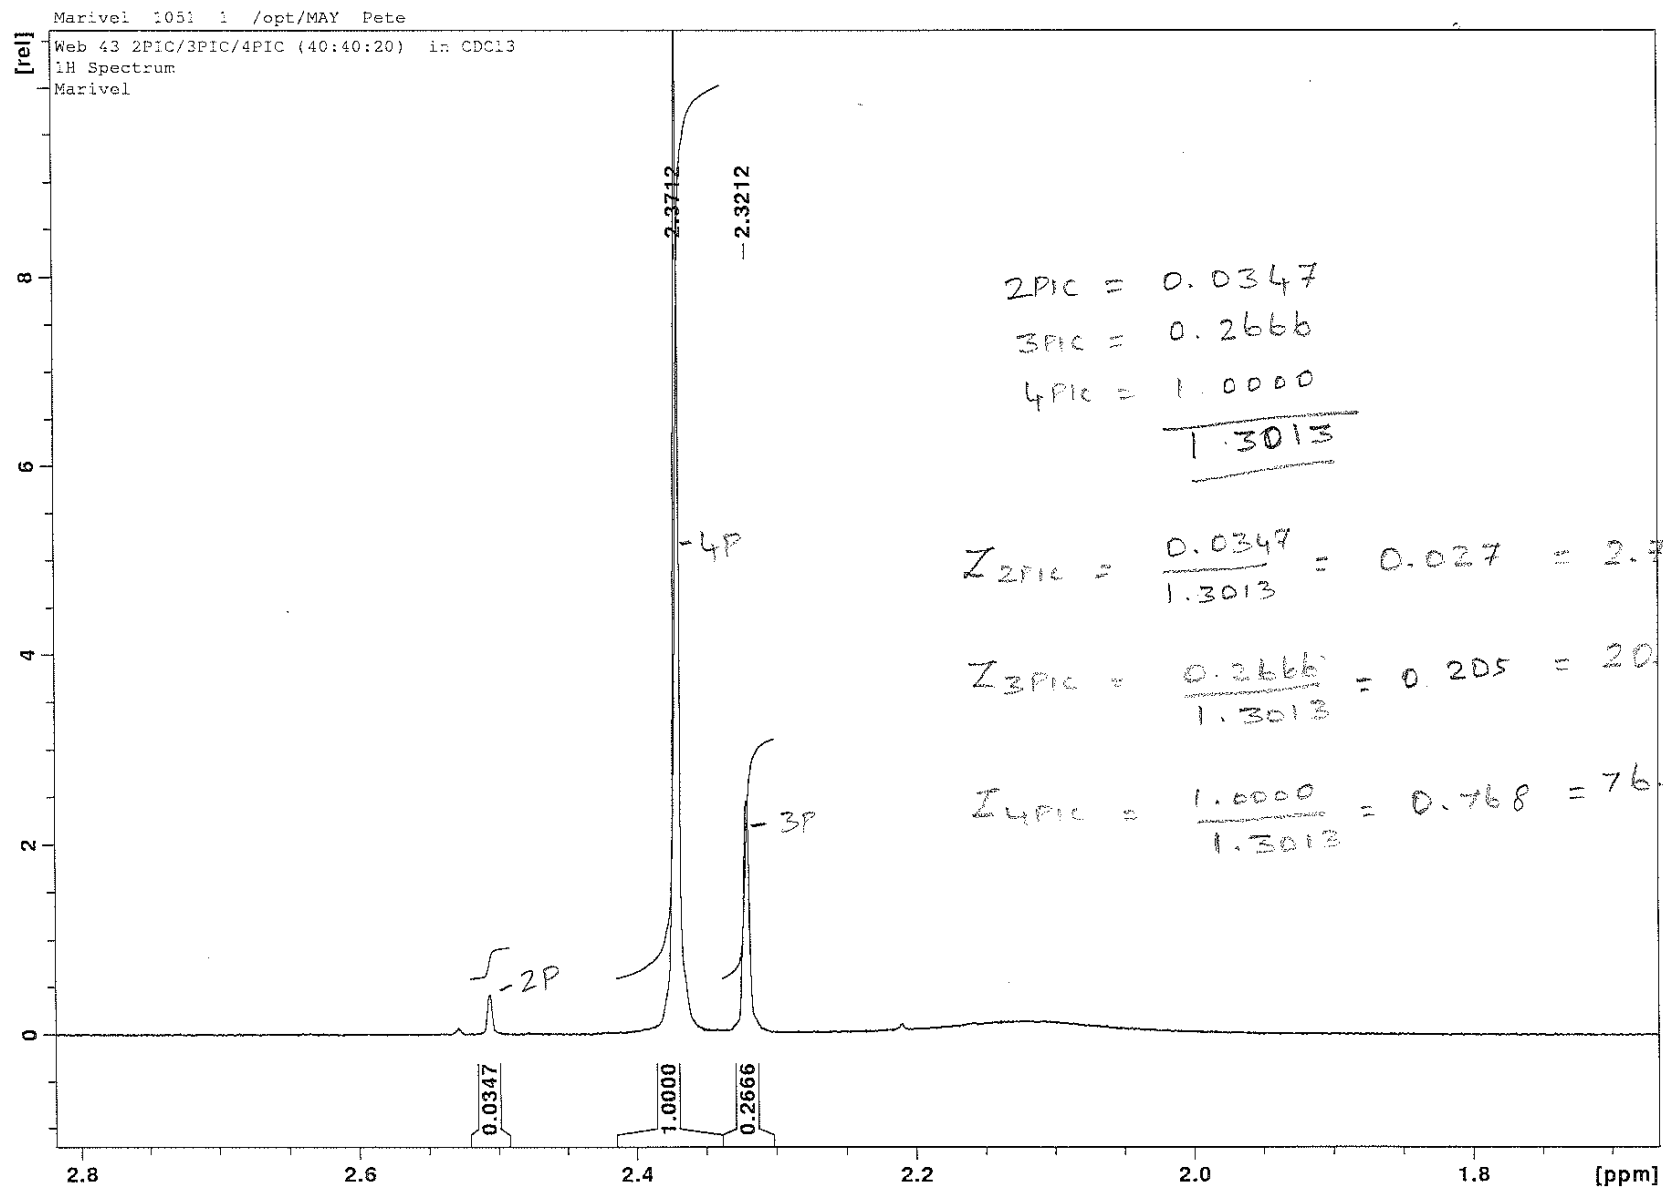

<sup>1</sup>H-NMR (400 MHz) spectrum of H.2PIC/3PIC/4PIC (0.4:0.4:0.2) in CDCl<sub>3</sub> at 25°C

4c. H.2PIC/3PIC/4PIC (0.4:0.2:0.4) – 'C'

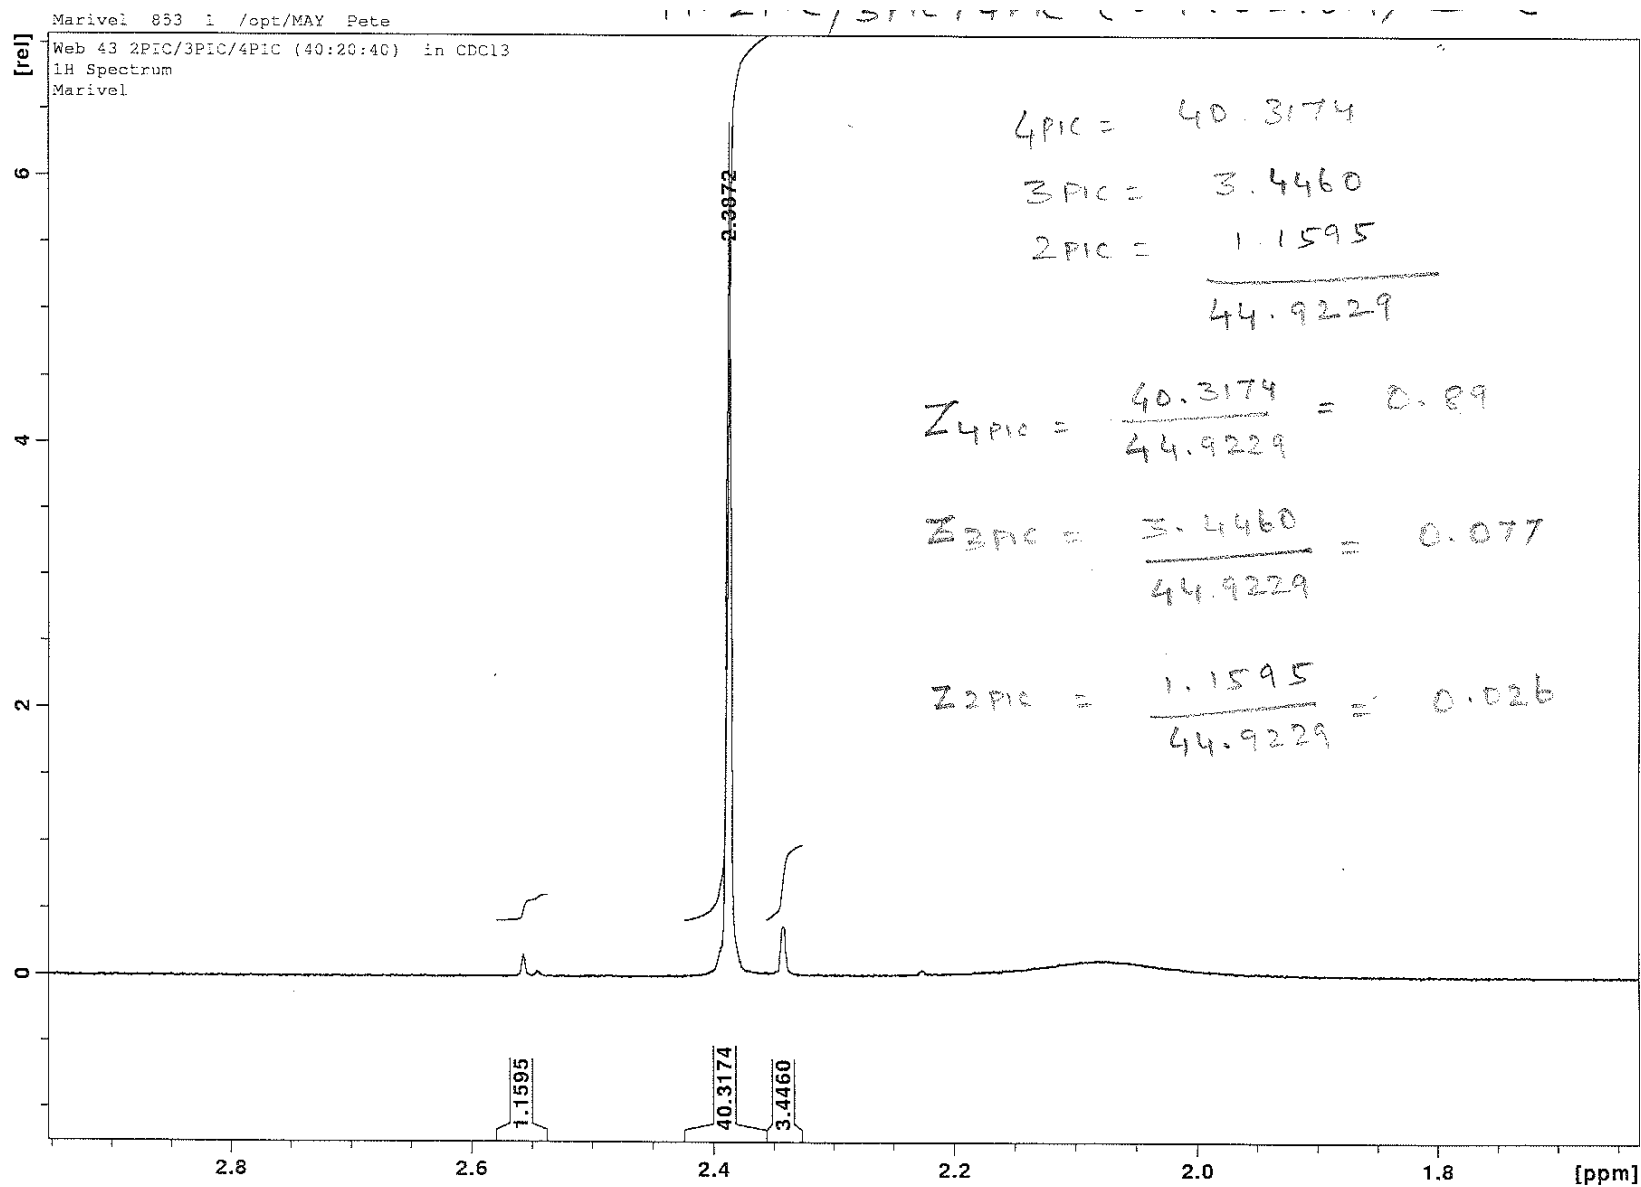

<sup>1</sup>H-NMR (400 MHz) spectrum of H.2PIC/3PIC/4PIC (0.4:0.2:0.4) in CDCl<sub>3</sub> at 25°C

4d. H.2PIC/3PIC/4PIC (0.2:0.6:0.2) – 'D' - VIII

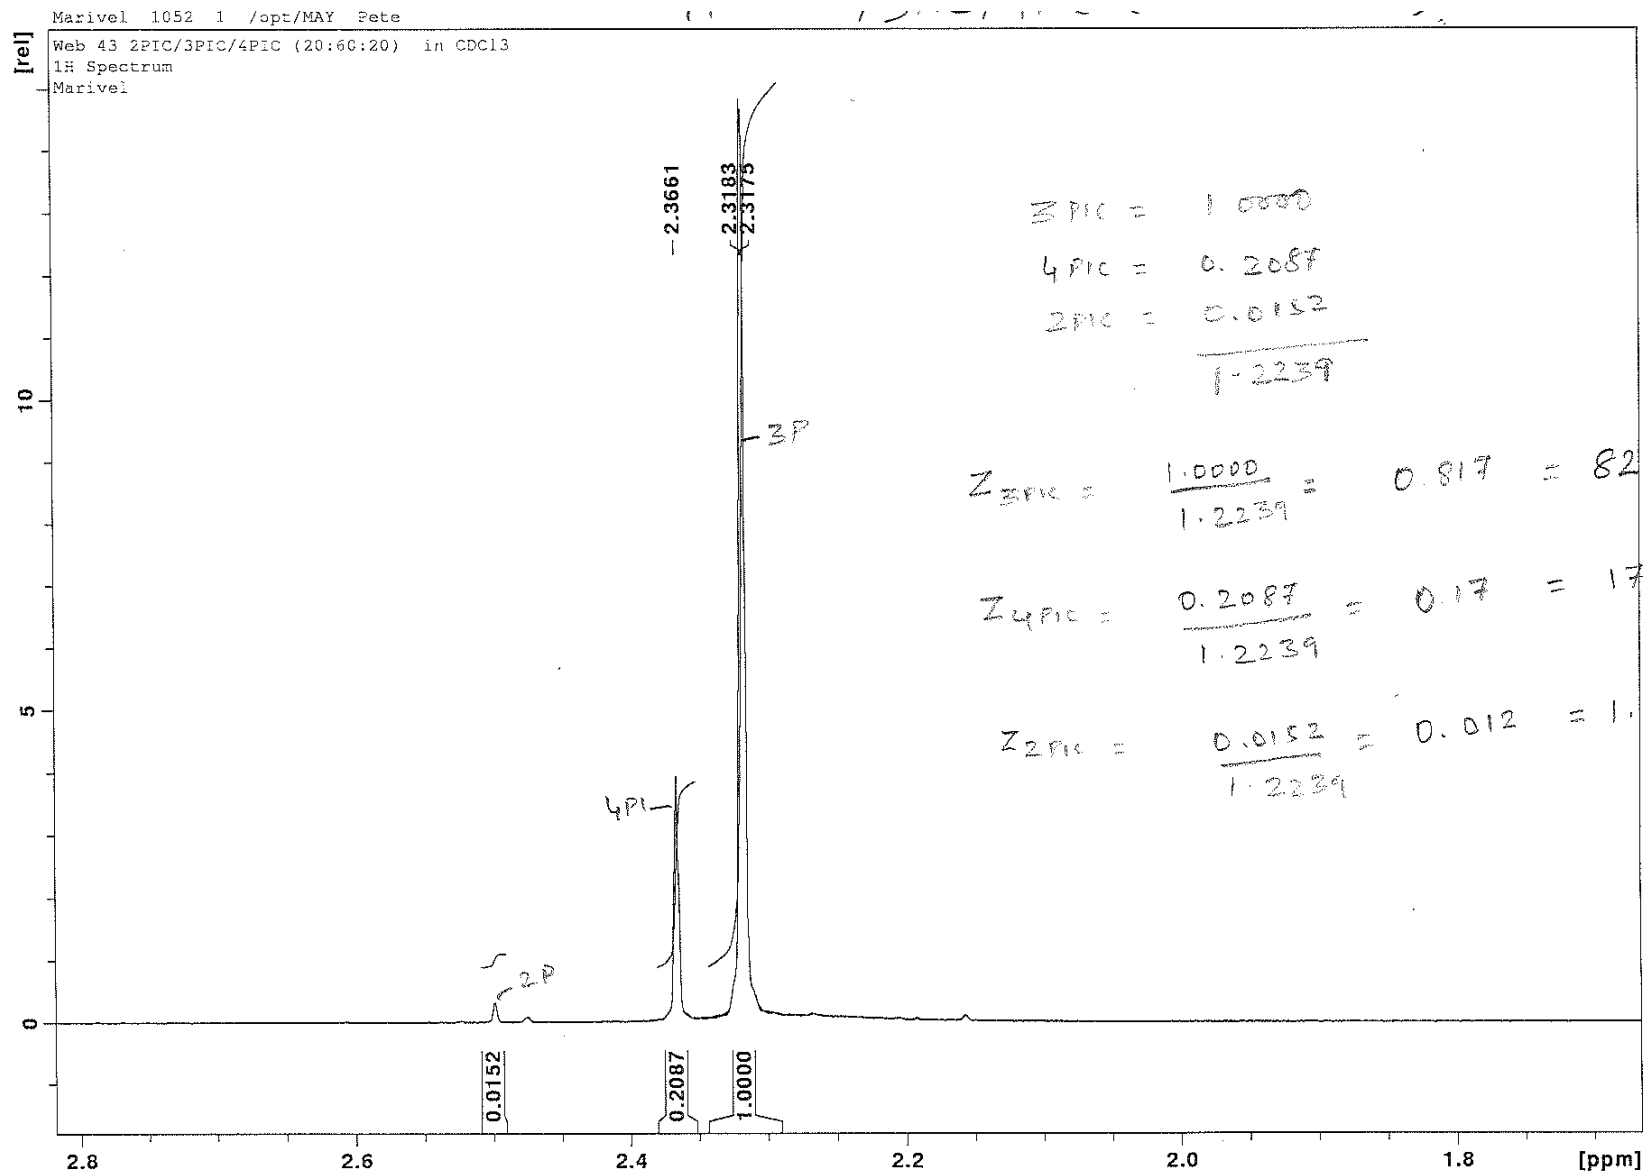

<sup>1</sup>H-NMR (400 MHz) spectrum of H.2PIC/3PIC/4PIC (0.2:0.6:0.2) in CDCl<sub>3</sub> at 25°C

4e. H.2PIC/3PIC/4PIC (0.2:0.4:0.4) – 'E'

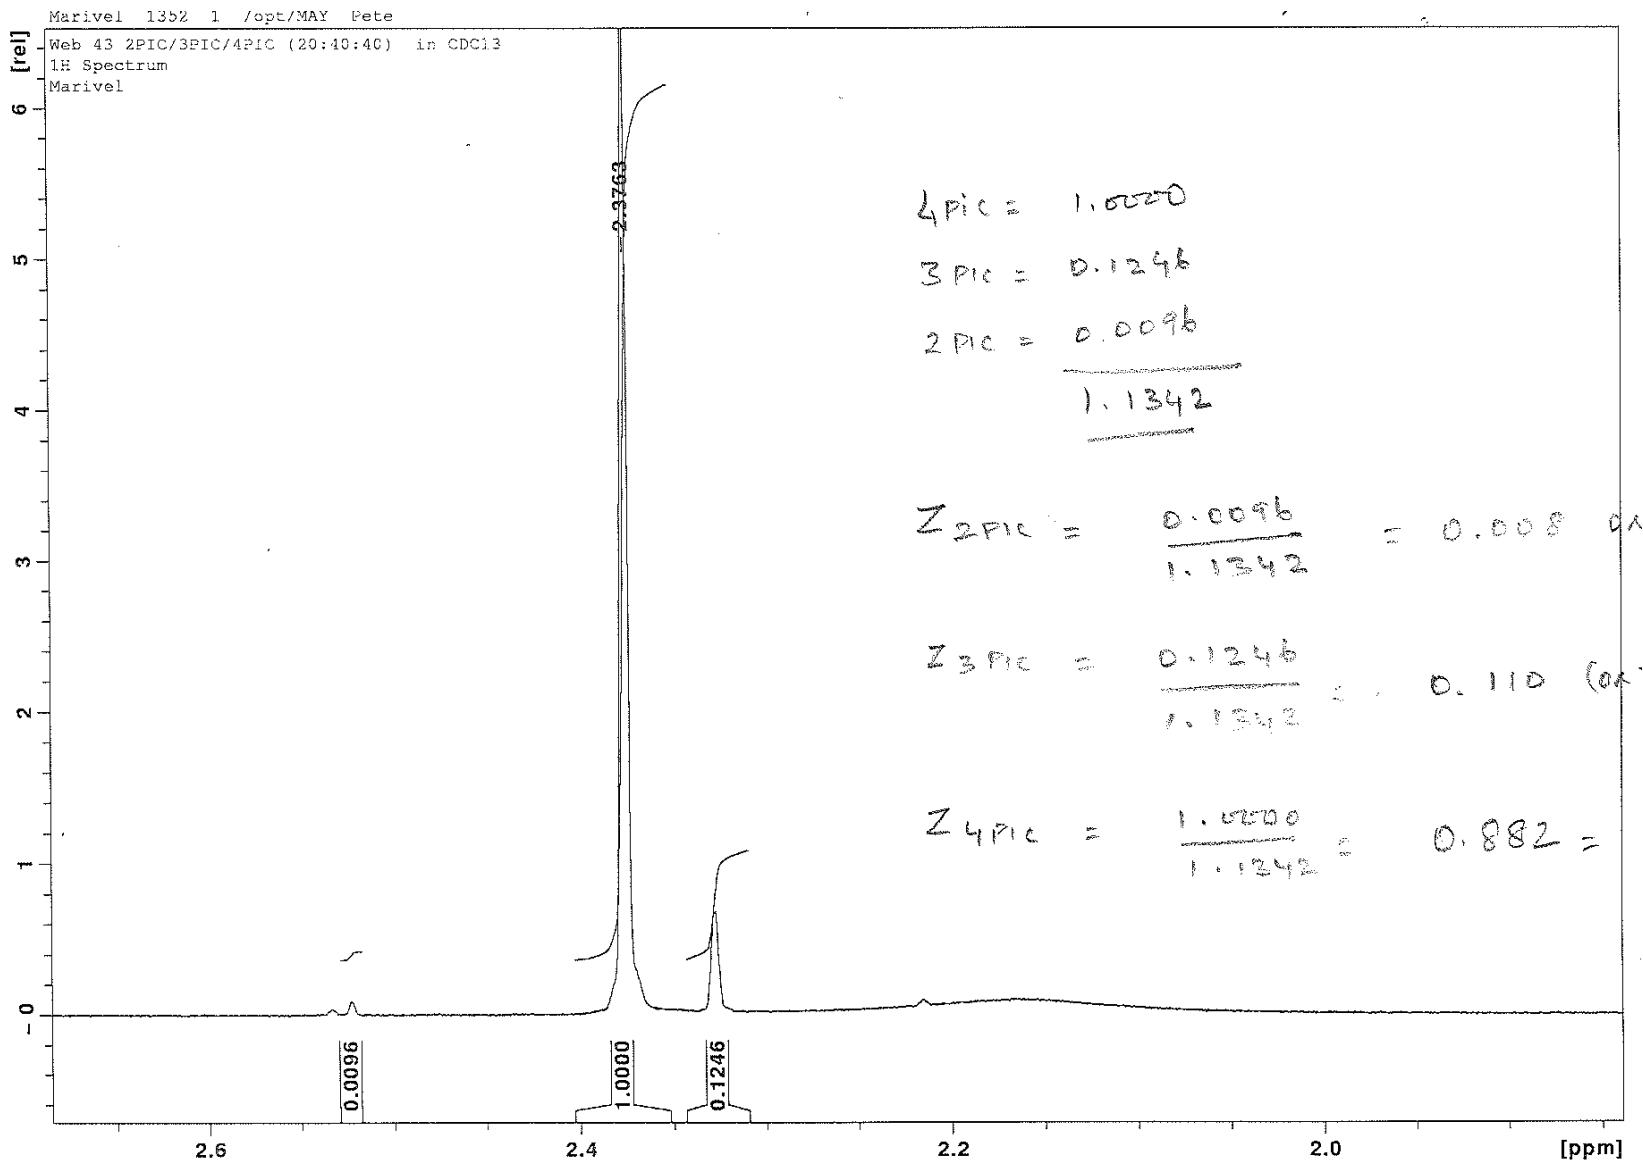

<sup>1</sup>H-NMR (400 MHz) spectrum of H.2PIC/3PIC/4PIC (0.2:0.4:0.4) in CDCl<sub>3</sub> at 25°C

4f. H.2PIC/3PIC/4PIC (0.2:0.2:0.6) – 'F'

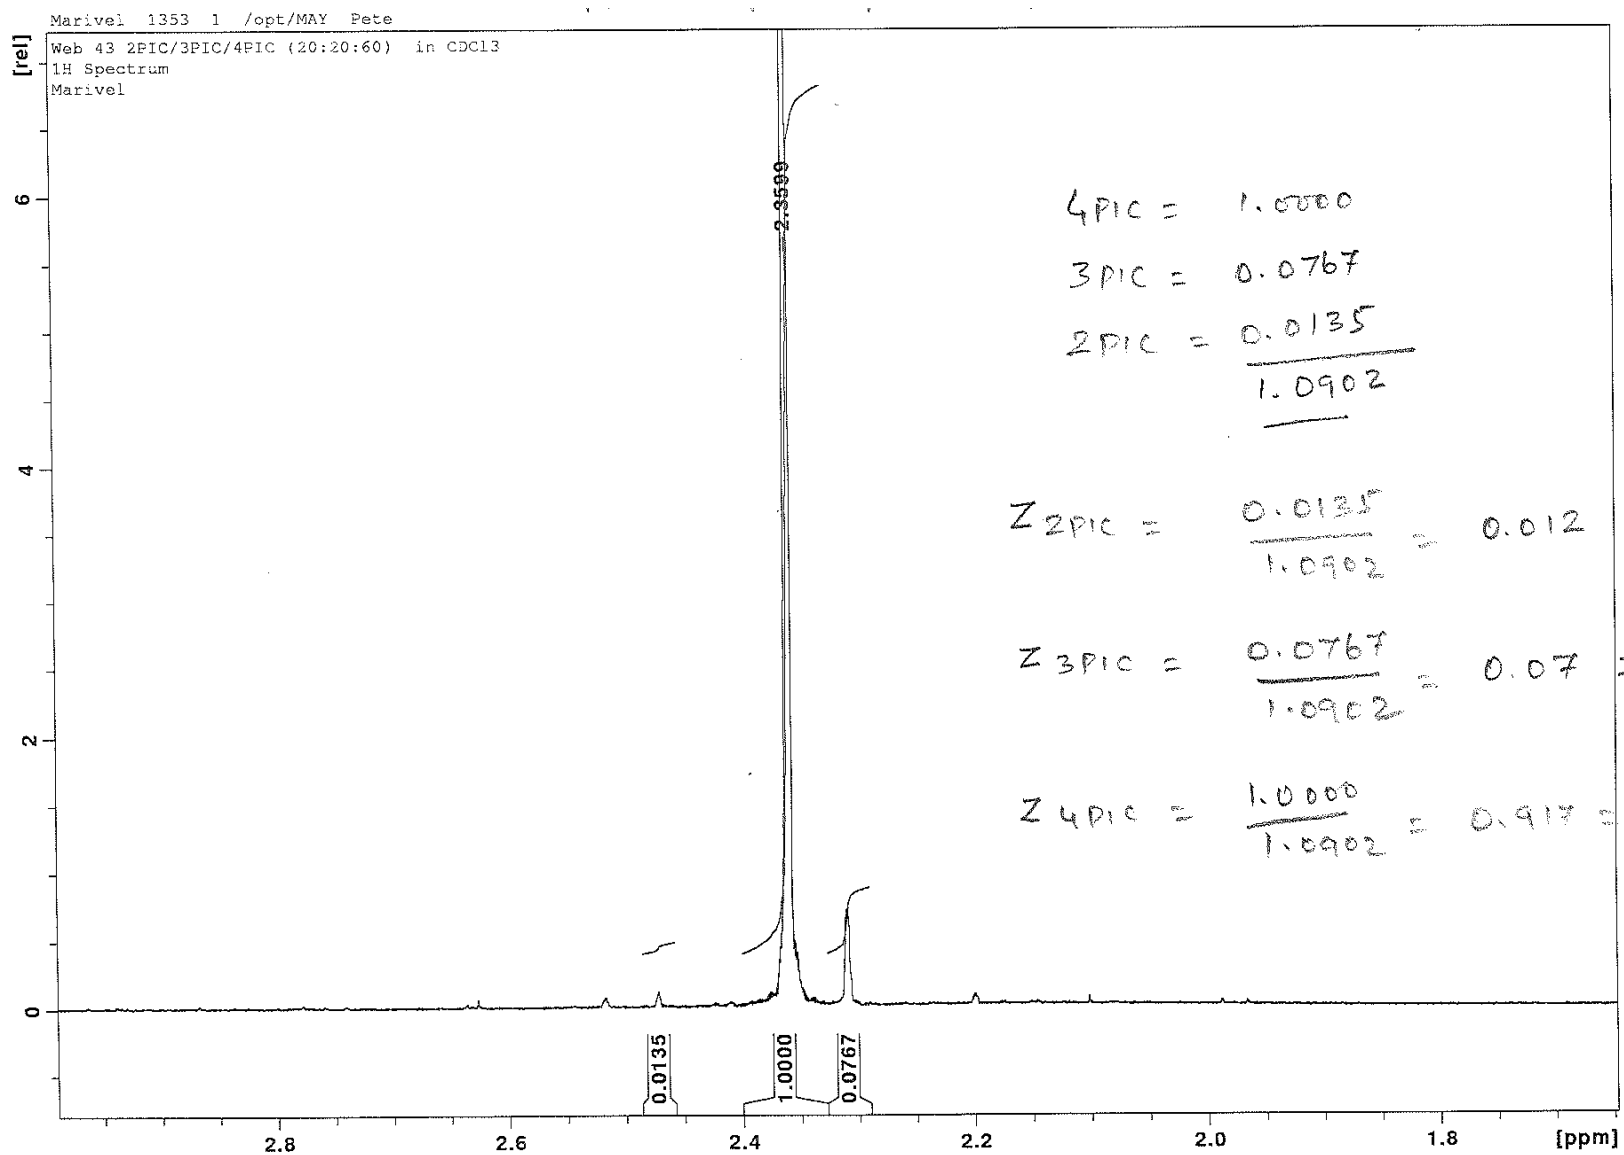

<sup>1</sup>H-NMR (400 MHz) spectrum of H.2PIC/3PIC/4PIC (0.2:0.2:0.6) in CDCl<sub>3</sub> at 25°C

4g. H.2PIC/3PIC/4PIC (0.33:0.33:0.33) – 'G'

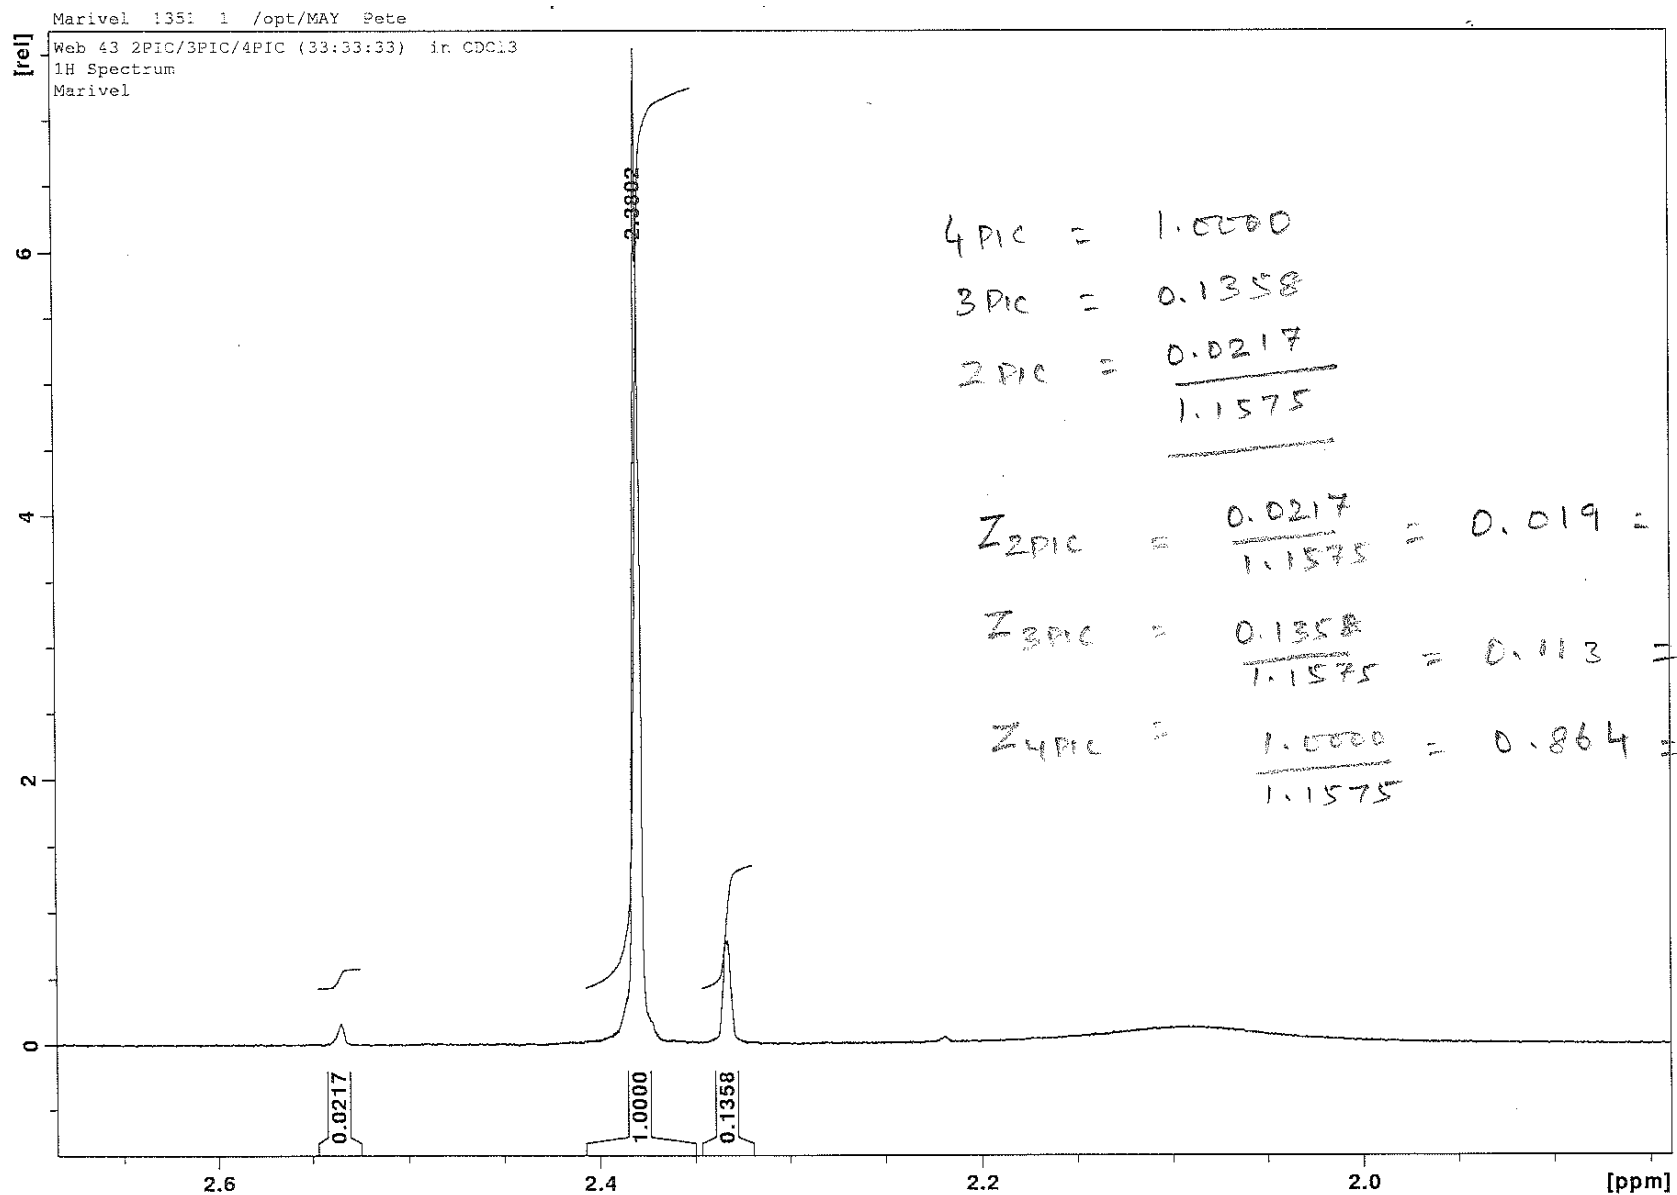

<sup>1</sup>H-NMR (400 MHz) spectrum of H.2PIC/3PIC/4PIC (0.33:0.33:0.33) in CDCl<sub>3</sub> at 25°C
